1  
2  
3  
4  
5  
6  
7  
8  
9  
10  
11  
12  
13  
14  
15  
16  
17  
18  
19  
20  
21

**Group dynamics and habitat use of the Giant Otter, *Pteronura brasiliensis* (Zimmermann, 1780), in seasonally flooded forest in the Araguaia River, Central Brazil: A 10-years study.**

Benaya Leles<sup>1</sup>, George Georgiadis<sup>1\*</sup>, Thais Susana<sup>1</sup>, Nils Kaczmarek<sup>2</sup>, Reuber Brandão<sup>3</sup>,  
Silvana Campello<sup>1</sup>

<sup>1</sup>Instituto Araguaia, Caseara, Tocantins, Brazil

<sup>2</sup>Institute for Environmental Sciences, University of Koblenz-Landau, Landau, Germany

<sup>3</sup>Departamento de Engenharia Florestal, Universidade de Brasília (UnB), Brasília, DF, Brazil

\* Corresponding author

E-Mail: [araguaia@araguaia.org](mailto:araguaia@araguaia.org)

These authors contributed equally to this work.

## 22 **Abstract**

23 We carried out monthly surveys of the giant otter population between 2010 and 2020 in  
24 a study area comprised of 1,500 hectares of igapó flooded forest with oxbow lakes in the  
25 Cantão region of central Brazil. We recorded 16-32 resident adults in the study area each  
26 year, distributed in 4-8 groups. Resident groups exhibited extensive home range overlap,  
27 with each group using several lakes and larger lakes used in rotation by up to six groups.  
28 Dens and campsites were also shared by multiple groups, but lakes were used by only  
29 one group at a time, and encounters between groups were very rare. 24 adult otters were  
30 observed to join an existing group. Some individuals changed groups multiple times.  
31 Resident adult turnover was high. Each year an average of 36% of resident adults were  
32 new immigrants, and 72% of groups left the area within two years. Resident groups had,  
33 on average, one litter every three years, and annual cub production showed high  
34 variability and a negative correlation to the number of new immigrants in the area. No  
35 pairs of giant otters reproduced successfully during the study. Groups of three otters  
36 formed through the recruitment of an adult individual by an existing pair and reproduced  
37 as successfully as larger groups. Group dynamics and territorial behavior in the Cantão  
38 flooded forest ecosystem, where optimal giant otter habitat is continuous in all directions,  
39 were found to be different from that reported in areas composed of patchy (isolated oxbow  
40 lakes) or linear (rivers) habitat. This suggest that giant otter social and territorial behavior  
41 is plastic and adapts to the spatial characteristics of the habitat.

42

## 43 **Introduction**

44           The giant otter (*Pteronura brasiliensis*) is an endangered top predator of  
45 tropical South American lakes and rivers [1-5]. Giant otters originally ranged broadly from  
46 the Andes to the coast of Brazil, but they were extirpated from much of their range by  
47 hunting for the pelt trade, primarily between 1940 and 1980. Today the easternmost  
48 remnant population of the species occurs in the Araguaia river basin of central Brazil.

49

## 50 **The Cantão Ecosystem**

51           The Cantão wetlands ecosystem is located at the confluence of the Javaés  
52 and Araguaia rivers, in the state of Tocantins in central Brazil (Fig 1). The region is a  
53 sharp ecotone between the Cerrado and Amazon biomes, with exceptional biodiversity  
54 [6]. The Javaés, a large black water river, is a 400-km offshoot of the Araguaia that flows  
55 around the world's largest freshwater island, Ilha do Bananal. Where it flows back into the  
56 Araguaia it forms a 100,000 hectare inland delta named Cantão, an elongated triangular  
57 floodplain crisscrossed by meandering channels and dotted with over 900 oxbow lakes.  
58 This is the largest expanse of suitable habitat for giant otters in the Araguaia river basin,  
59 and the species is reported to be common in the area [7-8].

60           Between December and May, the rising waters of the Araguaia dam the  
61 Javaés, and the entire delta floods with dark acidic waters, connecting the lakes. The  
62 igapó flooded forest which grows in Cantão is adapted to this cycle, with most tree species  
63 growing and fruiting during the peak of the flood and dropping their fruit into the water,  
64 where they are consumed by a wide variety of frugivorous fish. The dominant tall tree  
65 species are the landi (*Callophylum brasiliensis*) and the piranha (*Piranhea trifoliolata*),  
66 which grow to over 20 meters height. Non-forest habitat includes areas of shrubby

67 vegetation characterized by sarã (*Sapium haemospermum*) and goiabinha (*Psidium*  
68 *riparium*), which turn into marshes where bladderwort (*Utricularia* sp.) and other floating  
69 vegetation proliferates in the wet season. Shrub and marsh habitats occur on recently  
70 deposited sediment and cover less than 5% of the area of Cantão, but are sunlit and very  
71 productive during the floods, concentrating schools of fish like pacús (*Myloplus* sp.) and  
72 piranhas (*Serrasalmus* spp.).

73           In May water levels begin to drop quickly, and between June and September  
74 there is little to no precipitation. During the dry season the marshes and flooded forest dry  
75 out completely, and fish become concentrated in the lakes and in deep pools along river  
76 channels. Most fish predators, including giant otters, arapaima, peacock bass, caimans,  
77 and wading birds reproduce during this season.

78           To the east the Cantão floodplain is bordered by rolling plains of Cerrado  
79 vegetation, from which it is separated by the narrow Coco River, actually the easternmost  
80 channel of the Javaés delta. To the west it is bordered by the Araguaia river, which is up  
81 to three km wide here. Due to the very flat nature of the central Araguaia basin, seasonally  
82 flooded habitat similar to that found in Cantão also occurs in narrow strips and on river  
83 islands for hundreds of kilometers upstream along the Araguaia and Javaés rivers and  
84 their tributaries, although much of this has been altered by dams and irrigation projects in  
85 recent years.

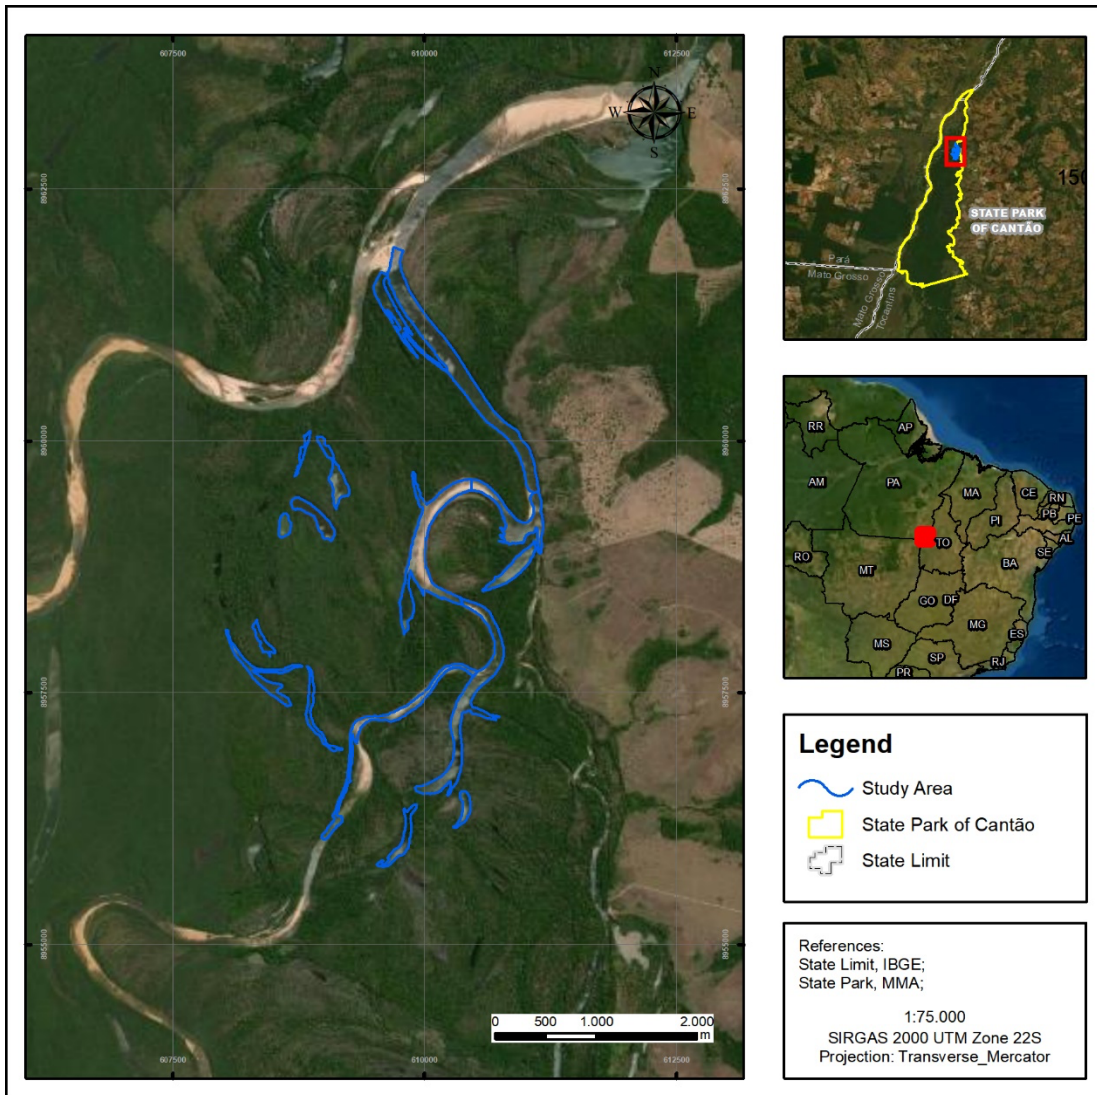

**Fig 1. Study area in Cantão, Brazil.**

Due to the abundance of nutrients made available by the annual flood, the aquatic ecosystem of Cantão is exceptionally rich and productive, hosting over 298 species of fish, whose abundance is among the highest known for Amazonia [9]. At the base of the food chain are many species of pacú, which feed primarily on fruit dropping from the flooded vegetation; piranhas, which are omnivorous, eating fish and falling arthropods as well as vegetable matter; and piaus (*Schizodon vittatus*), whose

95 specialized lips allows them to feed on the rich layer of mucus and microorganisms which  
96 covers the submerged vegetation. All of these are in turn preyed upon by an abundance  
97 of larger predators, including giant otters [10]. Other large aquatic apex predators that are  
98 common in Cantão include black caiman (*Melanosuchus niger*), araguaia river dolphins  
99 (*Inia araguaiaensis*), and arapaima (*Arapaima gigas*).

100           Most of the Cantão ecosystem is protected within 90,000-hectare Cantão State  
101 Park. The park is bordered by river channels on all sides and contains over 850 oxbow  
102 lakes with surface area greater than one ha, and over 240 km of channels meandering  
103 through its interior. Until 2017 the park was considered one of the best managed protected  
104 areas in the Brazilian Amazon [11] and was relatively well funded and staffed. The park  
105 is completely uninhabited except for a small area near the town of Caseara, which has  
106 been used by local people for seasonal agriculture since before the creation of the park.  
107 Fishing is prohibited inside the park, and most of it is off limits to unauthorized persons.  
108 Despite this, much of the park is vulnerable to invasion by fish poachers, who seek high  
109 value species like arapaima and tucunaré (*Cichla* spp.) which have been depleted outside  
110 the protected area. These poachers set up clandestine camps and fish nearby lakes until  
111 they are depleted. They not only reduce availability of fish prey, but also scare away or  
112 shoot giant otters, which they blame for declining fish stocks. Policy changes starting in  
113 2019 have weakened park management, with patrols becoming less frequent and  
114 poacher activity intensifying.

115

## 116 **Materials and Methods**

117           We conducted our studies in the vicinity of Instituto Araguaia's research  
118 station. The station is located in Instituto Araguaia's 540-hectare private inholding within  
119 Cantão State Park, thus facilitating logistics for the fieldwork. This area includes 15 oxbow  
120 lakes and 9,300 m of river channels. During the low water season, the river channels  
121 themselves become a string of long deep pools, ecologically very similar to oxbow lakes,  
122 separated by shallow sandbanks. The study site includes one of these stretches of river  
123 channel, totaling 16 lakes or lake-like bodies of water which retain water depths greater  
124 than two meters during the dry season. The largest lake, Lago Grande, is 2,220 m long  
125 and 110 m wide and remains connected to the river channel year-round. The other lakes  
126 range from 230 m to 1,218 m in length. These bodies of water are contained within a  
127 perimeter encompassing approximately 1,500 hectares of igapó flooded forest, with some  
128 marshes. The site is representative of the Cantão ecosystem as a whole, containing  
129 roughly proportionate samples of each of the park's natural communities. It is also one of  
130 the sectors of Cantão State Park least impacted by fish poachers, who are dissuaded by  
131 the year-round presence of Instituto Araguaia's researchers, rangers, and volunteers.

132           Surveys followed the 'Population Census Methodology Guidelines for the  
133 Giant Otter [12]. In the dry season, lakes and river channels were surveyed using canoes,  
134 and isolated lakes were surveyed on foot. In the wet season, lakes, channels, flooded  
135 marshes, and igapó forests were surveyed by canoe. Traditional dugout canoes, as well  
136 as fiberglass canoes, were used, powered by 44-pound electric motors. We found that  
137 giant otters are less disturbed when approached with an electric motor than by paddling  
138 because with the electric motor the observer can remain silent and motionless.



139           Surveys were conducted between sunrise and 11:00h, and between 15:00h  
140 and sunset, which are the giant otters' peak hours of activity [2, 13]. When giant otters  
141 were sighted, the group was followed from a distance large enough to avoid alarming the  
142 animals (between 30 and 200 meters, depending on the behavior of the group).  
143 Panasonic DMC-FZ series cameras with 18-50x optical zooms were used to film and  
144 photograph the giant otters, allowing subsequent identification of individuals by their  
145 throat markings and accurate counts of group size. Data from direct observations were  
146 complemented with images from Reconyx and Bushnell camera traps (several models  
147 over the years), placed at the entrance of active dens, on campsites, and along giant otter  
148 trails between lakes.

149           Survey years were defined to extend from May 1 to April 30 of the following  
150 year to coincide with the period between peak floods and to encompass a full giant otter  
151 reproductive season. For survey purposes, two stretches of the river channel within the  
152 core area that remain deep enough in the dry season for giant otters to swim and forage  
153 were classified as "lakes". Both of them are isolated from other water bodies by extensive  
154 shallow areas during the dry season and are very similar to lakes in terms of dimensions  
155 and habitat characteristics.

156           Regular surveys started in September 2010 encompassing four lakes around  
157 Instituto Araguaia's research station. In 2011 surveys were carried out in eight lakes, in  
158 2012 in 12 lakes, and from 2013 to 2019 surveys covered the entire core study area,  
159 defined to include 16 lakes and lake-like stretches of deep river channels. In 2020 it was  
160 not possible to adequately survey one group of three lakes on the eastern edge of the  
161 study area because armed fish poachers set up a permanent camp in the area during the



162 dry season. Surveys were conducted monthly between August 2010 and April 2021, for  
163 periods varying between four and 23 field days. In the dry season (June-November) every  
164 lake in the core area was surveyed by researchers at least once a week, with camera  
165 traps left at active dens and campsites. In the wet season access to parts of the area was  
166 blocked during periods when water levels were too high for surveys on foot but not high  
167 enough to allow access by canoe. During these periods most lakes were surveyed at  
168 least once a month, and temporarily inaccessible lakes were surveyed using camera traps  
169 left at known wet season den sites for periods of up to two months. Additional data was  
170 obtained during annual expeditions to lakes in the region adjacent to the core study area,  
171 as well as to other sectors of Cantão Park.

172           A sighting catalog for individual giant otters was developed according to  
173 Groenendijk et al. [12]. Individuals were identified by their unique throat markings. Each  
174 individual entered into the catalog was given a name and an identifying number. Each  
175 group recorded also received a group number. Groups whose composition changed were  
176 considered to be the same group when at least 60% of the individual members remained  
177 constant [12]. Sex information was obtained when possible by the identification of sexual  
178 characteristics in videos and camera trap images.

179           Giant otters were considered to be resident in the core study area if they  
180 exhibited territorial behaviors (denning, use of latrines, or actively approaching intruders  
181 while periscoping) and were recorded within the study area on at least three separate  
182 days for a period of 30 or more days. Groups and solitary otters that did not fulfill these  
183 criteria were considered to be transient and were excluded from the analyses of habitat  
184 use and range overlap but were included in the analyses of group size and composition.

185 Giant otter records obtained inside the flooded forest during the wet season were  
186 assigned to the nearest lake for home range evaluation.

187           Animals recorded were classified into three age groups: “Newborn cubs” were  
188 defined as animals up to around 60 days old, which remain inside the den and cannot  
189 enter the water on their own, although they may sometimes be seen briefly outside the  
190 den entrance, or while being carried by adults; “free-swimming cubs” are animals 60-180  
191 days old which are able to enter the water on their own, initially for brief swimming lessons  
192 with the adults and later to follow the adults in their daily foraging, and which can be  
193 identified as cubs by their swimming behavior and size [12]; all other animals were  
194 classified as “adult-sized”.

195           It was often possible to distinguish juveniles up to one year old from older  
196 individuals but to be able to use data from multiple observers, we did not use this  
197 information in our analysis. Only records of free-swimming cubs were included in the data  
198 analysis. Records of newborn cubs could only be obtained opportunistically and were  
199 excluded from the analysis because we had no way of determining the mortality rate of  
200 cubs before they became free-swimming and could be observed reliably. Litter sizes and  
201 cub survival rates were calculated based on the number of free-swimming cubs recorded  
202 each season that survived until the following year.

203           Annual turnover rate of resident adult individuals at the study site was  
204 calculated by dividing the number of resident adults that were not resident on the previous  
205 year by the total number of resident adults on the site each year. The same calculation  
206 was performed for resident groups. Dispersal distances were calculated both in a straight  
207 line and along the shortest water route, following meandering river channels and lakes.

208           Although we analyzed our results in the light of published material regarding  
209 giant otters, we did not identify many long-term continuous surveys similar to our study  
210 which could serve as a comparative parameter to our data.

211

## 212 **Results**

213           We obtained 3141 records of giant otters during the study, being 2651 through  
214 camera traps and 490 through direct observation. We were able to identify 168 individual  
215 giant otters. The total number of adult-sized otters recorded in the studied area each year  
216 varied from 16 to 32 (mean = 23; SD = 6), distributed between 4 and 8 groups (mean =  
217 5; SD = 1.2) (Fig 2).

218

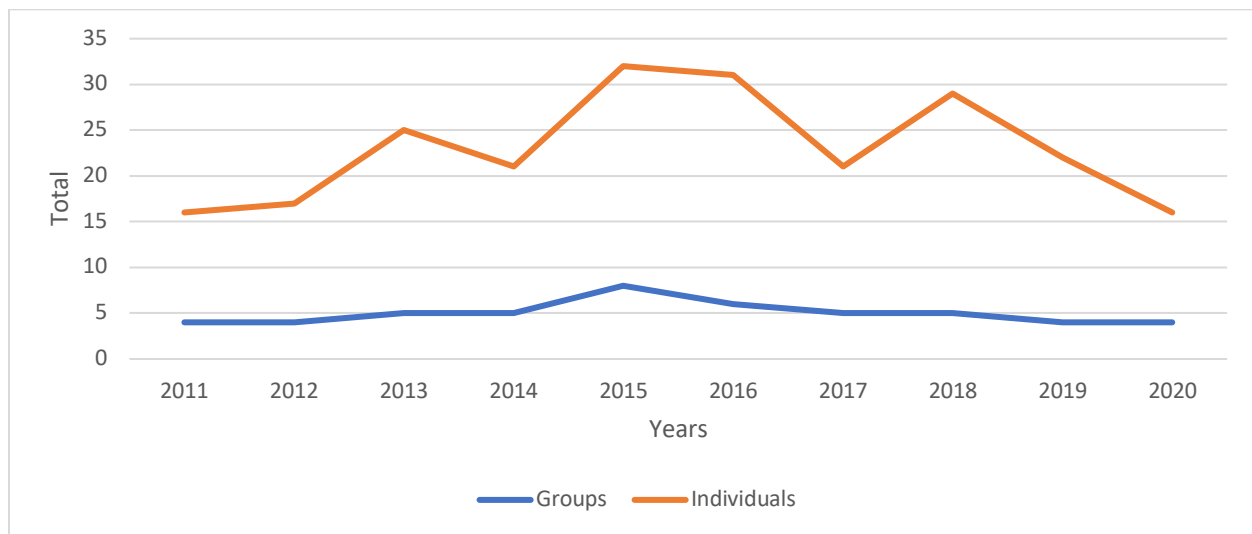

219

220 **Fig 2. Total number of giant otter individuals and groups in the study area in**  
221 **Cantão, Brazil.**

222

223 The annual turnover of individuals and groups in the core study area was high.  
224 Between one and 17 of the resident adult giant otters recorded each year (or 5-68% of all  
225 resident adults recorded; mean = 36%) were new residents that had not been present in  
226 the previous year (Fig 3). These immigrants moved into the study area either as entire  
227 groups or as individuals that joined a resident group (Fig 4). 72% of groups whose arrival  
228 date into the study area was known remained resident in the area for two years or less  
229 before moving elsewhere. A single group remained in the area for 8 years and is still  
230 present as of July 2021 (Fig 5).

231

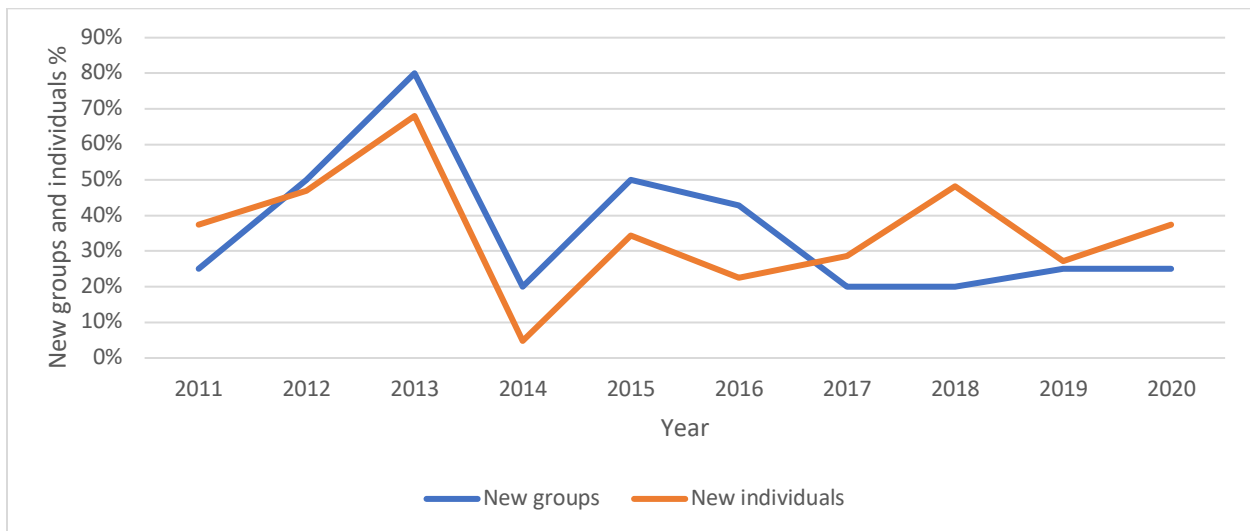

232

233 **Fig 3. Annual turnover rate of individuals and groups (%) of giant otter in the study**  
234 **area in Cantão, Brazil.**

235

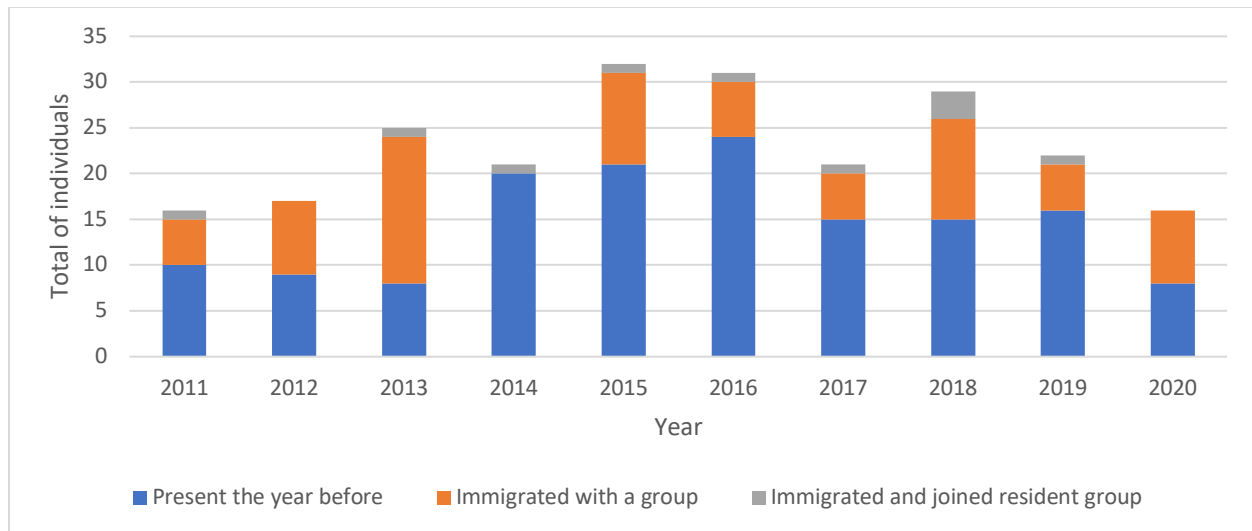

236

237 **Fig 4. Origin of individuals of giant otter recorded in the study area in Cantão,**  
238 **Brazil.**

239

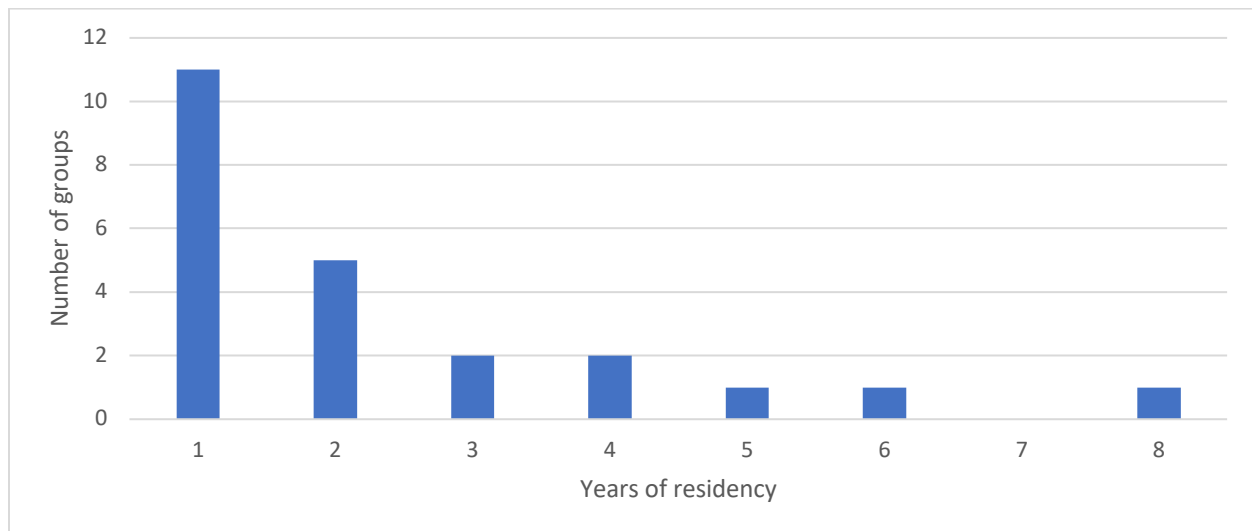

240

241 **Fig 5. Years of residency of giant otter groups in the study area in Cantão, Brazil.**

242

## 243 **Habitat Use and Range Overlap**

244

245

Resident giant otter groups exhibited extensive home range overlap within the core study area. Most groups used several lakes throughout the year, but the set of lakes

246 used by each group changed from year to year. Small, isolated lakes tended to be used  
247 by a single group each year. Over the ten years of the study, in the 11 monitored lakes  
248 that are less than 1,000 meters long, only five instances were recorded of a lake being  
249 used by more than one group during the same year. Three of these instances took place  
250 in lakes located within 100 meters of a larger lake which was also being used by one or  
251 more of the groups. Of the 5 monitored lakes longer than 1000 meters, two (Quebra-Linha  
252 and Lago do Estirão) are undergoing siltation due to natural processes and are  
253 significantly narrower and shallower than most large Cantão lakes. These were used by  
254 1–3 groups each year. The remaining three bodies of water longer than 1000 meters  
255 (Lago Grande, Estirão, and Lago das Ariranhas) are relatively wide and deep over most  
256 of their lengths (Fig 6). Throughout the survey, most (52 %) records of resident groups  
257 were obtained in these three lakes, with each lake being used by up to six groups at  
258 different times over a single year.

259

260

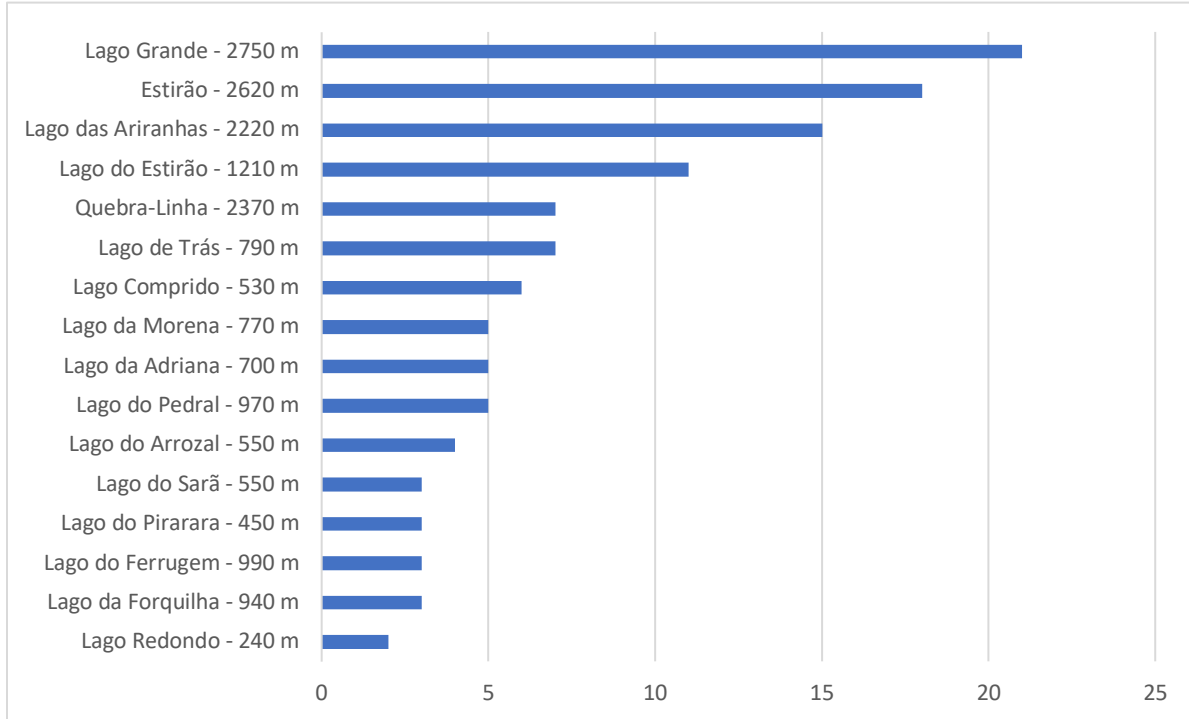

261

262 **Fig 6. Total number of groups of giant otter recorded at each lake in the study**  
263 **area in Cantão, Brazil.**

264

265 Lake usage patterns observed were highly variable (Fig 7). Groups rarely  
266 remained in each lake for more than a few hours before moving on. A group might use a  
267 particular lake once or several times over a few days, and then not return to it for a period  
268 ranging from a few days to until the following year. Some groups returned to certain lakes  
269 regularly over multiple years, while other groups used them sporadically, with long  
270 intervals between visits.

271



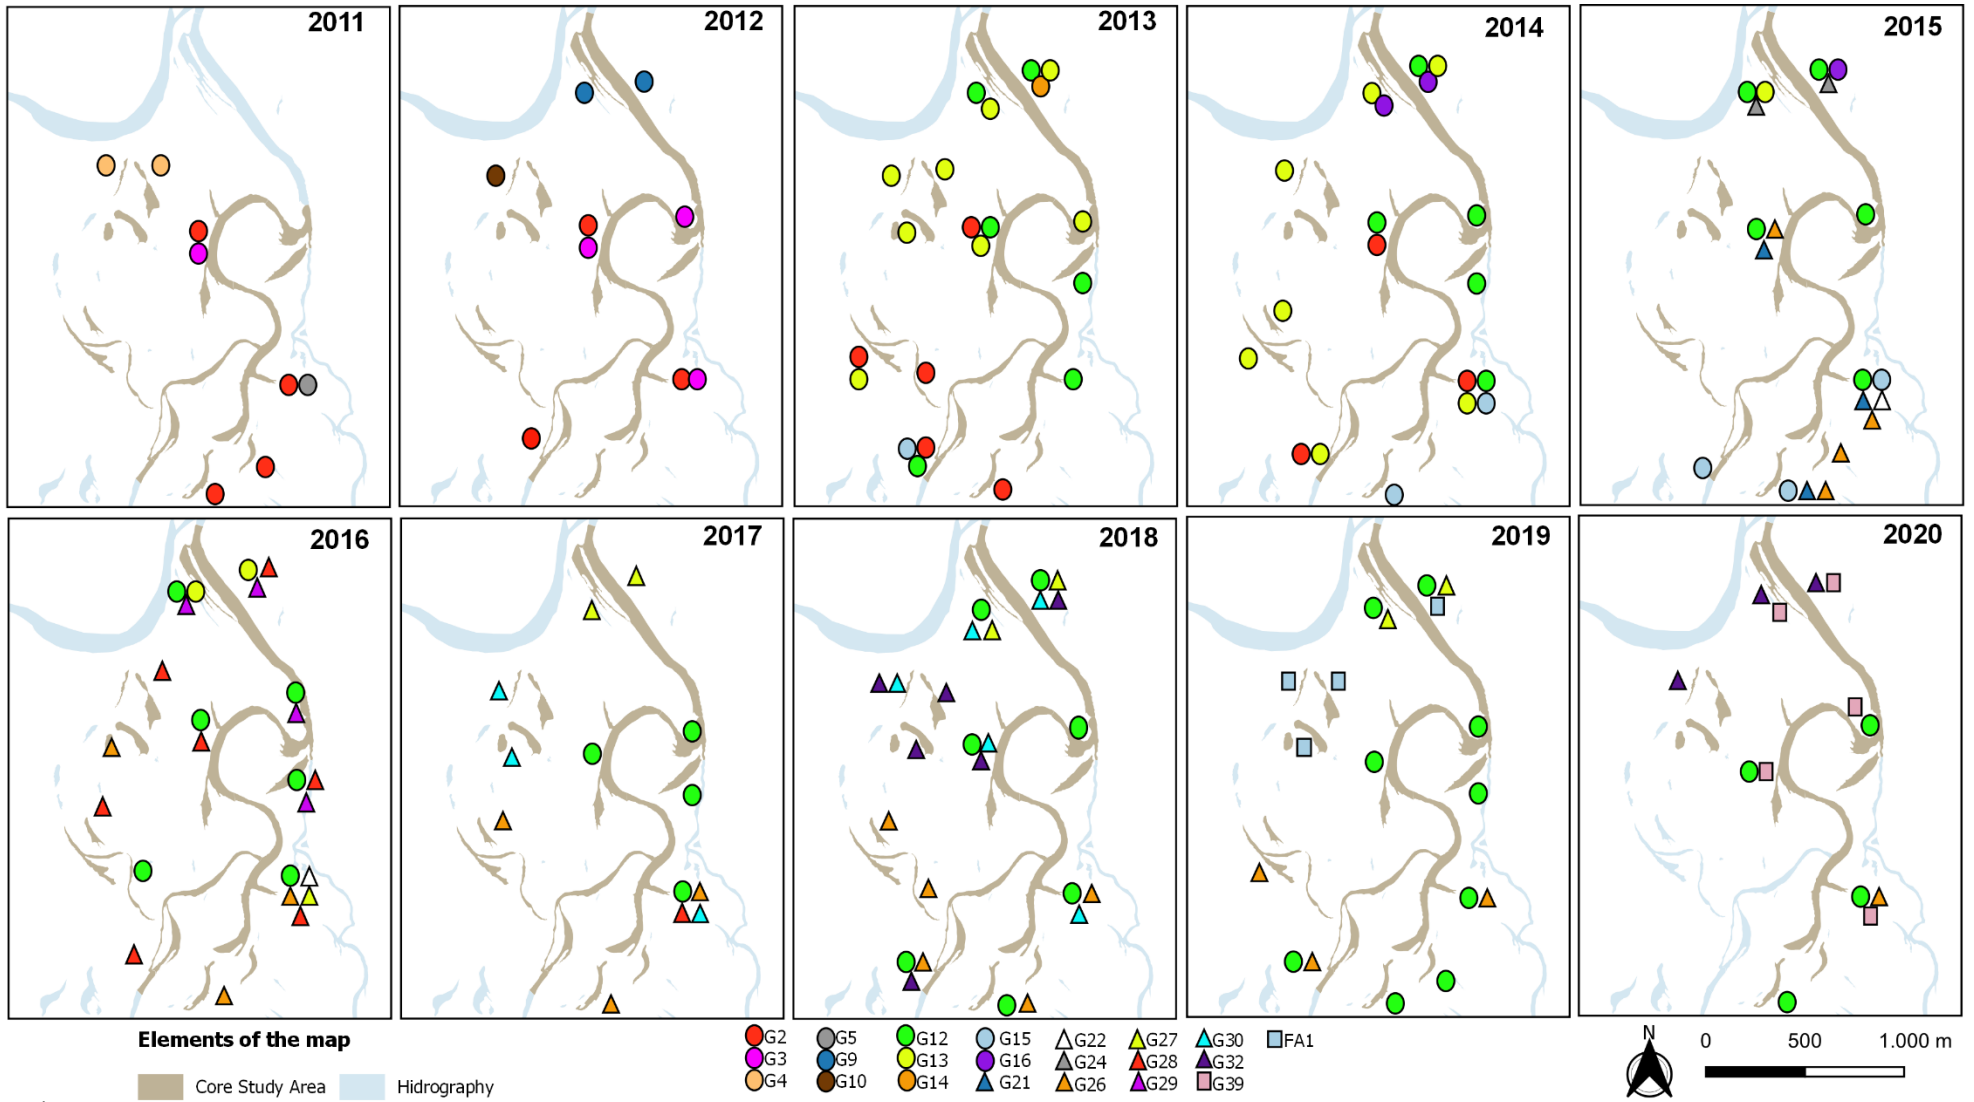

273

**Fig 7. Lake usage by resident groups of giant otter in the study area in Cantão, Brazil.**

274

275           During periods when two or more groups shared a lake, usage patterns varied  
276 from each group using the lake on different months to two or more groups using the lake  
277 on alternate days over 1 – 2 weeks. Only 16 times throughout the survey there was more  
278 than one group recorded in a given lake on the same day. While using lakes, groups  
279 tended to use the same dens and campsites as the previous groups. Denning sites and  
280 campsites in prime locations were used almost continually by as many as 11 different  
281 groups throughout the survey.

282           During the annual floods, giant otters extended their range into the flooded  
283 areas between lakes. Most giant otter encounters during this season occurred inside the  
284 flooded vegetation, although most records of throat markings were obtained while the  
285 animals were crossing open water or by camera traps. During the floods, groups were  
286 observed to use lakeside dry-season dens and campsites located on ground high enough  
287 to remain above water, but also campsites on patches of high ground within the flooded  
288 forest, far from open water.

289

## 290 **Group Dynamics**

291           Observed group size ranged from 2 to 8 individuals (mean = 4.1, median = 4,  
292 n = 55) (Fig 8). Group size and composition changed over time with births, adult  
293 individuals joining existing groups, and individuals disappearing.

294

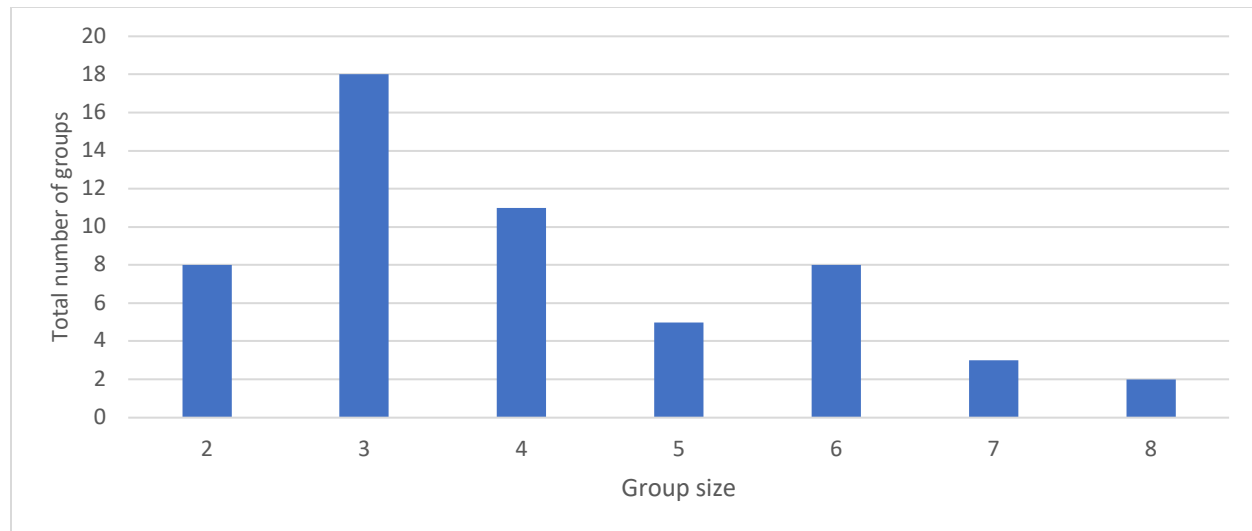

295

296 **Fig 8. Size of groups of giant otter in the study area in Cantão, Brazil.**

297

298 We recorded 24 episodes of adult-sized giant otters joining a group of two or  
299 more animals. In 11 of these observations, the new otter was formerly a member of a  
300 resident group. Three otters joining groups were resident solitaries, and 10 were new to  
301 the area. In two cases the new group members subsequently left the group and joined a  
302 different group. Of 18 adult-sized individuals of known sex that joined existing groups, 13  
303 (72%) were male. Of the individuals that were new to the study area and joined a resident  
304 group whose sex was determined, three were male and two were female. In 16 cases  
305 where we were able to determine the status within the group of the new member, three  
306 became the reproductive female, three became the reproductive male, and the remainder  
307 (two females, two males, and six of undetermined sex) became non-reproductive  
308 subordinate group members. One of the subordinate females became the breeding  
309 female of her group when the original breeding female disappeared after three years.  
310 19 groups formed by three giant otters were recorded in the core study area. 18 of these  
311 trios (94%) were resident groups. Six groups of three otters were formed when a

312 preexisting pair of giant otters was joined by a third adult-sized individual, and one group  
313 of three otters was composed of former members of three different resident groups. This  
314 group was first recorded after it had formed so it was not possible to determine whether  
315 it also started as a pair that was later joined by a third individual. Of the five individuals  
316 that joined a pair to form a group of three whose sex was determined, four were male.  
317 One group that was first recorded as a trio consisted of two males and one female. The  
318 remaining groups of three were either already formed when first recorded or were the  
319 remnants of a larger group that had lost members. We observed immigrant groups or  
320 individuals of giant otters dispersing distances up to 16.5 km of linear distance (Table 1).  
321

322 **Table 1. Dispersal distances for immigrant groups of giant otter and individuals of**  
323 **known origin, in the study area in Cantão, Brazil.**

| Individual or Group | Dispersal year | Place of Origin    | Dispersal place    | Linear distance | Shortest water route |
|---------------------|----------------|--------------------|--------------------|-----------------|----------------------|
| Pb_52               | 2014           | Estirão            | Lago das Ariranhas | 10.92 km        | 13 km                |
| Pb_52               | 2015           | Lago das Ariranhas | Lago Grande        | 14.05 km        | 17,4 km              |
| Pb_81               | 2015           | Lago da Lua        | Lago Grande        | 16.5 km         | 31,6 km              |
| Pb_52               | 2016           | Lago Grande        | Paredão            | 5.93 km         | 9,44 km              |
| FA1                 | 2019           | Lago do Pequizeiro | Lago Comprido      | 9.01 km         | 13,06 km             |

324

325           28 solitary giant otters were recorded in the core study area. Eleven of these  
326 met the criteria to be classified as a resident, and three of these were formerly members  
327 of resident groups. The remaining solitaires were transients. Resident solitaires were  
328 often observed to approach boats and periscope. Nine of the solitary otters recorded  
329 subsequently formed pairs or joined existing groups in the study area, and seven of these  
330 had been resident solitaires during the previous year. Of 12 solitary giant otters whose  
331 sex was determined, eight were male and four were female. Of 4 transient solitaires of  
332 known sex, three were male.

333           23 pairs of giant otters were recorded in the study area throughout the survey.  
334 Of these, nine were residents and 14 were transient. Only one resident pair remained in  
335 the area as a pair for more than one year. All other resident pairs either left the area or  
336 were joined by a third adult animal within one year. 21 pairs were formed during the study.  
337 All consisted of at least one member that was a former resident of the study area, and in  
338 five pairs both members were former residents. Only two pairs were formed by new  
339 members to the area. Of 28 individual otters of known sex that formed pairs, 17 (68%)  
340 were former residents (eight males and nine females) and eight were new to the area (six  
341 males and two females).

342           Fig 9 illustrates the changing composition and exchange of members over time  
343 of 17 giant otter groups monitored during the study. Group 2, a breeding resident group,  
344 was joined by an adult-sized female in 2011, which remained subordinate to the breeding  
345 pair. In 2013 the breeding male disappeared and was replaced by Pb 53 a new male  
346 arrival. In 2014 this new male bred with the 2011 female and was assisted in rearing the  
347 cubs by two remaining offspring of the original breeding pair. In 2015 the group left the

348 core study area. Group 12 immigrated into the study area with three members in 2012,  
349 being two males and a female, and was soon joined by a female (Pb 30) whose parental  
350 group disappeared from the study area. Within a week one of the males left G12 to  
351 become the breeding male of G13, a group of five otters. In 2014 G12 had a litter, and  
352 Pb 30 acted as a babysitter for the breeding pair. In 2013 Pb 30 left the group to form a  
353 pair with a Pb 91, a new arrival to the study area. G12, now with three adult-sized  
354 members, had two more litters, and in 2019 was joined by a male giant otter that assumed  
355 a subordinate role to the breeding pair. Meanwhile, after an unsuccessful attempt to  
356 breed, individual Pb 30 disappeared from the area and her mate, Pb 91, formed a trio  
357 with two other animals, one of which was Pb 53, which had left G2 and returned to the  
358 study area after a year's absence.

359

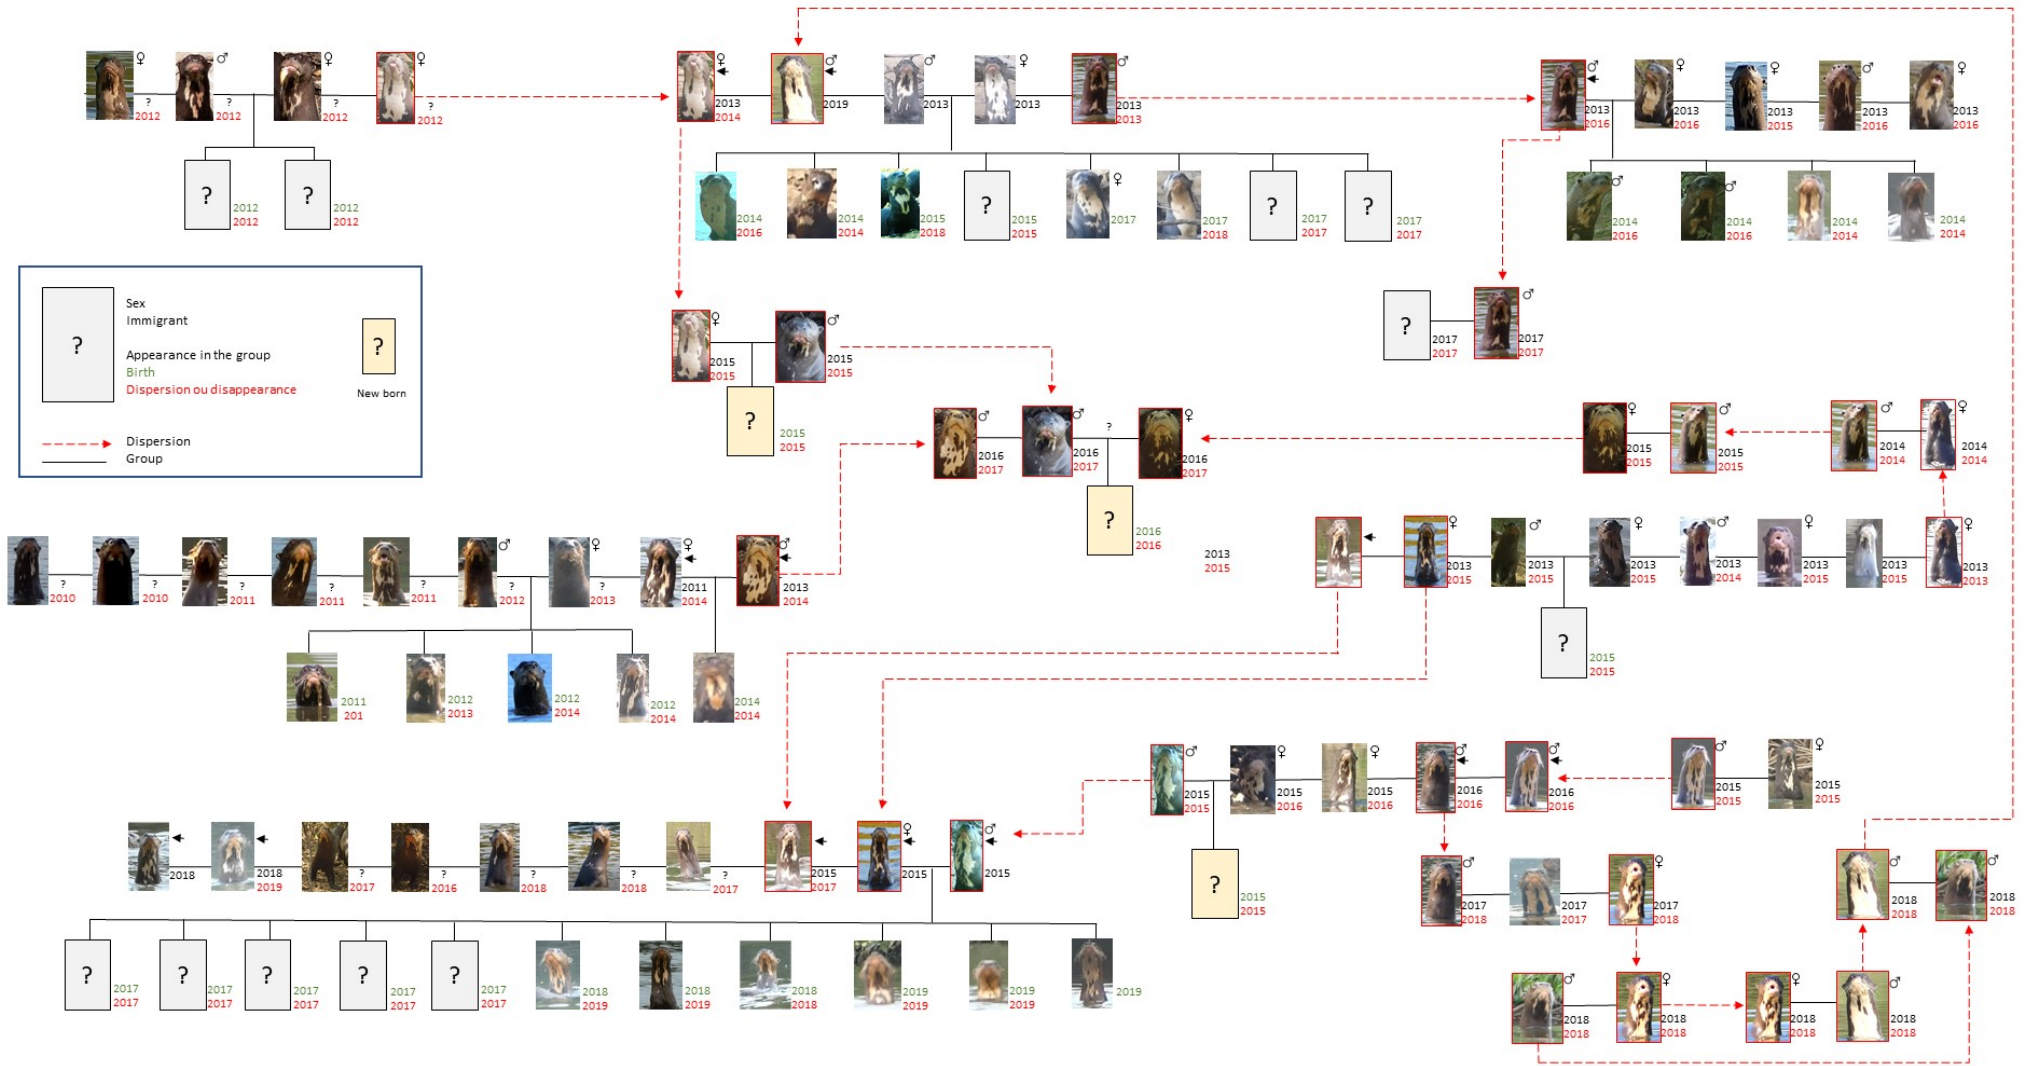

**Fig 9. Member turnover and formation dynamics of giant otter groups in the study area in Cantão, Brazil.**



## 362 **Reproduction**

363 We recorded 17 litter events that produced 42 cubs that reached the free-  
364 swimming stage. Litter size at the free-swimming stage ranged from 1-5 (mean = 2.5;  
365 median = 2) (Fig 10). Seven cubs too young to enter the water on their own were also  
366 recorded, and five of these (71,5%) disappeared before reaching the free-swimming  
367 stage. All first records of free-swimming cubs occurred between June and December,  
368 suggesting that births took place between April and October.

369

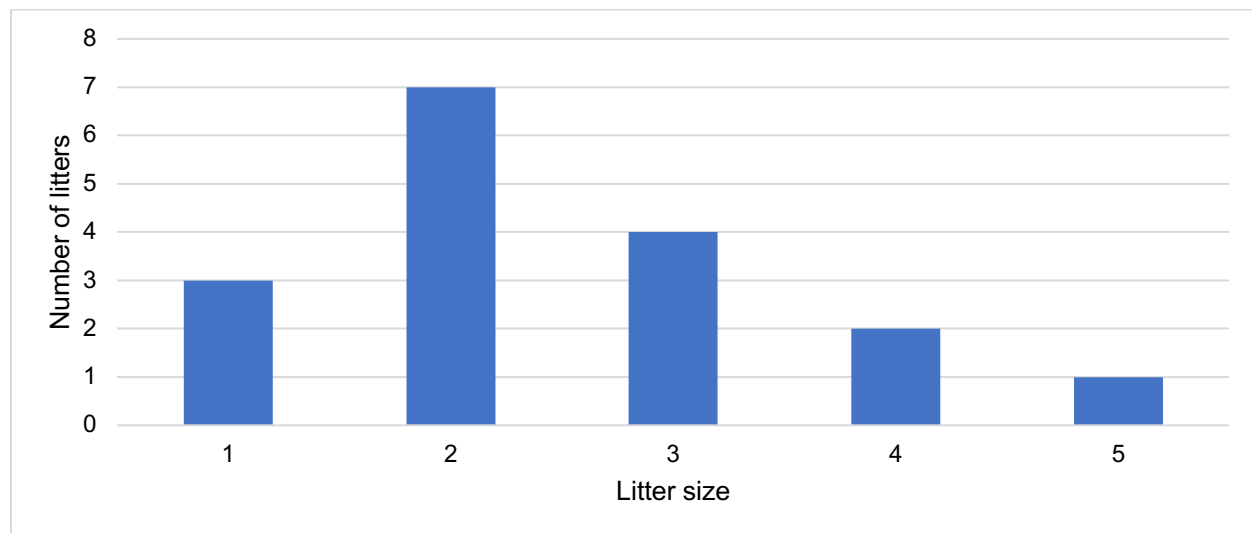

370

371 **Fig 10. Number of litters and litter size of giant otters in the study area in Cantão,**  
372 **Brazil.**

373

374 The number of cubs produced per year in the core study area between 2012  
375 and 2020 ranged from 0 to 12 (mean = 4.2) and showed high annual variability (Fig 11).  
376 Resident groups had, on average, one litter for every three years of residency (N = 55).

377 The average number of free-swimming cubs produced per year per resident adult  
378 (including both breeding and non-breeding group members) was 0.18 (N = 228).

379

380

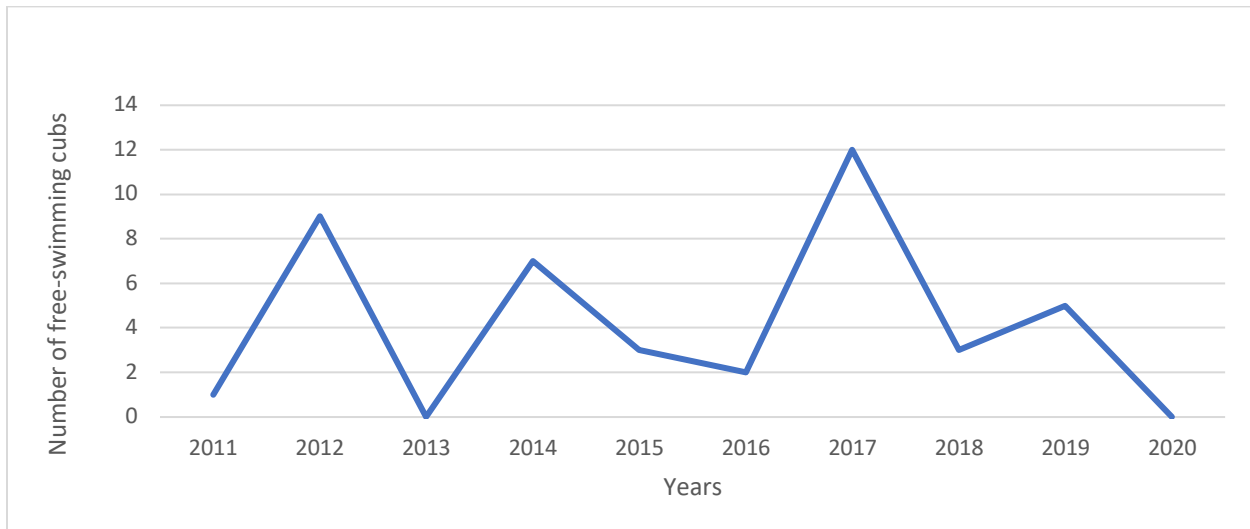

381

382 **Fig 11. Annual number of free-swimming cubs (approx. 60 days old) of giant otters**  
383 **in the study area in Cantão, Brazil.**

384

385 Only one pair was observed to have reared cubs to the free-swimming stage  
386 while residing in the core study area, and these cubs disappeared a few weeks later. Two  
387 other pairs were recorded to have produced newborn cubs that did not survive to the free-  
388 swimming stage (Table 2).

389

390 **Table 2. Number of litters by group size of giant otter in the study area in Cantão,**  
391 **Brazil.**

| <b>Group size</b>             | <b>Number of group-years</b> | <b>Number of litters</b> | <b>Litters per group-year</b> | <b>Total free-swimming cubs</b> | <b>Cubs/group</b> | <b>Free-swimming cubs/adult (all adults)</b> |
|-------------------------------|------------------------------|--------------------------|-------------------------------|---------------------------------|-------------------|----------------------------------------------|
| <b>2</b>                      | 8                            | 1                        | 0,13                          | 1                               | 0,13              | 0,06                                         |
| <b>3</b>                      | 18                           | 7                        | 0,39                          | 16                              | 0,89              | 0,30                                         |
| <b>4</b>                      | 11                           | 3                        | 0,27                          | 5                               | 0,45              | 0,11                                         |
| <b>5</b>                      | 5                            | 1                        | 0,20                          | 4                               | 0,80              | 0,16                                         |
| <b>6</b>                      | 8                            | 5                        | 0,63                          | 16                              | 2,00              | 0,33                                         |
| <b>7</b>                      | 3                            | 0                        | 0,00                          | 0                               | 0,00              | 0,00                                         |
| <b>8</b>                      | 2                            | 0                        | 0,00                          | 0                               | 0,00              | 0,00                                         |
| <b>Total adults<br/>= 210</b> | 55                           | 17                       | 0,31                          | 42                              |                   | 0,2                                          |

392

393

394

395

396

397

398

399

400

401

The mean number of free-swimming cubs born per resident group year (including years when a resident group had no free-swimming cubs) was 0.76 (n = 55 group years). Pairs of giant otters had the lowest number of litters per group-year, while groups of three giant otters averaged as many free-swimming cubs produced per adult group member as larger groups. 10 groups that had free-swimming cubs were recorded again in the following year. Among these, the average cub survival rate after one year was 56%. The mean number of surviving cubs after one year per adult-sized group member was 0.37 (n = 41) (Fig 12).

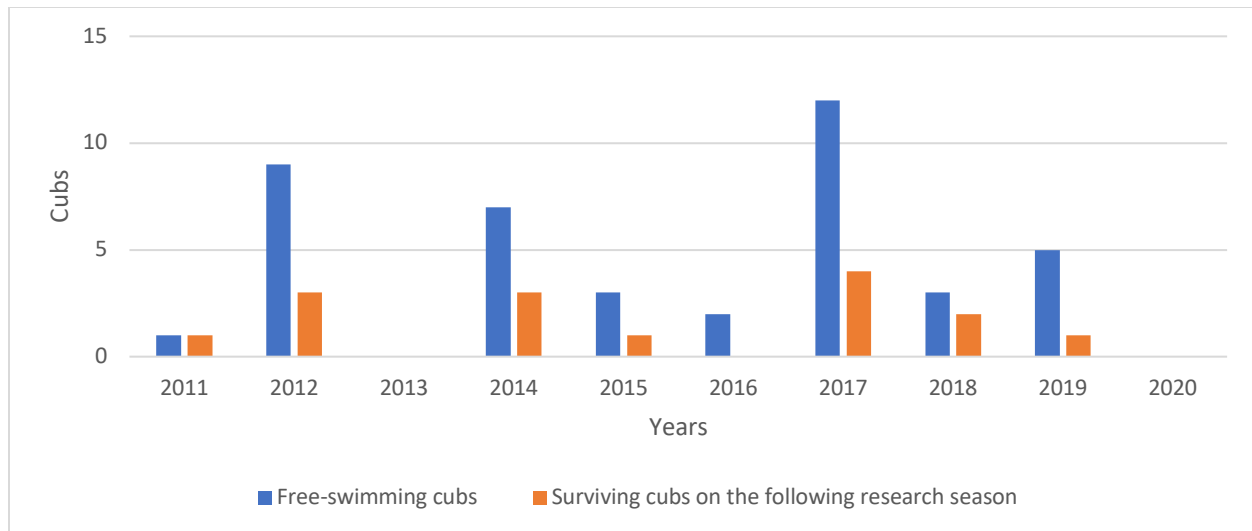

402

403 **Fig 12. Survival of free-swimming cubs of giant otter after one year in the study**  
404 **area in Cantão, Brazil.**

405

406 Annual cub production did not seem to correlate with the height or duration of  
407 the annual flood but showed a negative correlation with the number of members of  
408 immigrant groups that moved into the area during each of these years ( $r = -0.56$ ) (Fig 13).  
409 Data from 2011 and 2012 were excluded from this calculation because part of the study  
410 area was not surveyed during those years.

411

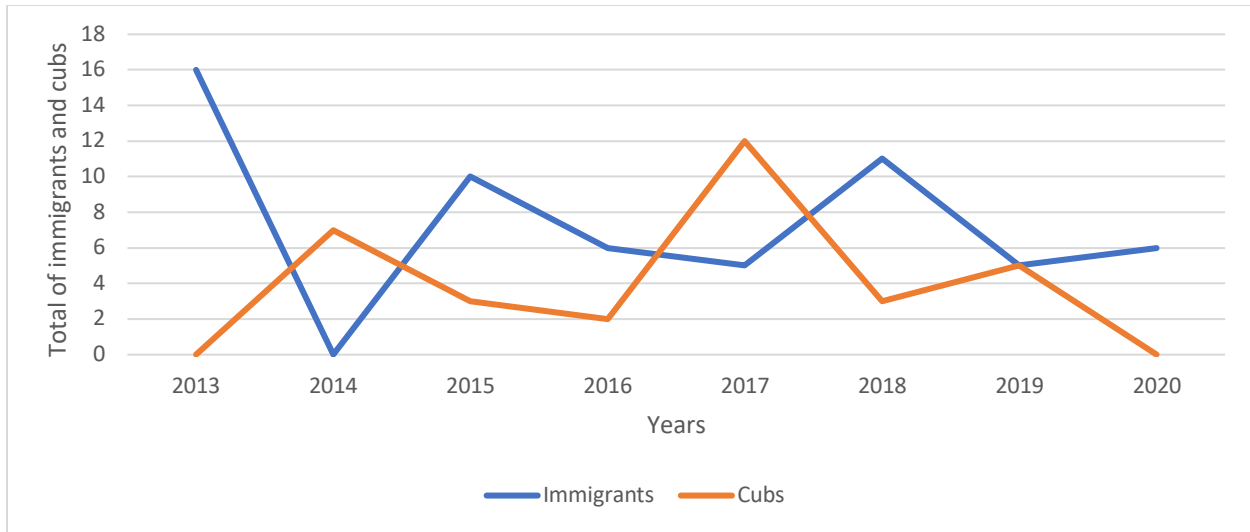

412

413 **Fig 13. Correlation between number of free-swimming cubs and number of**  
414 **immigrant giant otters in the study area in Cantão, Brazil.**

415

## 416 Discussion

417 Until recently, giant otters were thought to live in stable family groups  
418 occupying stable home ranges [1, 14]. More recent studies showed that groups  
419 sometimes include unrelated members [15], and that group home ranges can overlap  
420 those of other groups [16, 17]. In Cantão we found giant otter group composition and  
421 home ranges to be very fluid. Group home ranges overlap extensively and shift from year  
422 to year, with multiple groups sharing the largest lakes, but not synchronically. Even dens  
423 are commonly used by different groups. Group composition also changes constantly, not  
424 only as cubs are born and adult members leave, but also as new adult-sized individuals  
425 join existing groups, eliciting a complex social system in the species.

426 In the Pantanal, Ribas et al. [15] found that some groups included subordinate  
427 individuals that were not offspring of the breeding pair, whereas Leuchtenberger and

428 Mourão [17] also observed adult-sized animals entering new groups as subordinates. In  
429 southeast Peru, by contrast, Groenendijk et al [18] found that immigrants were only  
430 recruited into a resident group if they claimed the dominant breeding status. In our study  
431 we observed adult-sized individuals joining established groups as both subordinate and  
432 breeding members. Nine out of 23 resident groups recorded (39%) were observed to  
433 accept new members throughout the study. Of 36 adult-sized new group members whose  
434 origin was determined during the study, 15 were cubs that had survived their first year  
435 while 21 had joined the group as adults. This suggests that giant otter groups in Cantão  
436 may, on average, contain more immigrants than offspring of the breeding pair as  
437 subordinate members.

438           Despite sharing most or all of their home range with other groups, giant otter  
439 groups in Cantão are quite successful at avoiding one another. Only 16 times during the  
440 study we recorded different groups in the same lake on the same day. Agonistic  
441 encounters also appear to be rare. While we sometimes saw otters with bite marks from  
442 fights that quickly healed, we never saw a seriously injured otter, suggesting that  
443 individuals engaged in few agonistic encounters. Agonistic encounters also appear to be  
444 uncommon in southeast Peru [18]. These observations contrast with findings in the  
445 Pantanal, where agonistic interactions were frequently recorded [17, 19-21].

446

## 447 **Reproduction**

448           Reproduction of giant otters in Cantão showed great annual variability, with  
449 resident groups producing free-swimming cubs on average once every three years. This  
450 contrasts with what was observed in southeast Peru [18], where resident groups

451 produced one litter per year. Variations in the annual number of cubs produced did not  
452 correlate with flood level or duration but showed an inverse relationship with the total  
453 number of resident adults and with the number of individuals in groups that immigrated  
454 into the area during the previous year. This suggests that successful reproduction of giant  
455 otters in Cantão may be depressed by an increase in the density of resident giant otters  
456 as well as by the disruptions provoked by the arrival of new individuals or groups into a  
457 patch of habitat [18]. Mourão and Carvalho [19], observed infanticide and cannibalism in  
458 the species by a solitary male that was located close to the home range of a group formed  
459 by six adults and agonistic behaviors were reported in areas with high individual density  
460 or in contact zones of two groups territories [21, 22]. Males that enter in a new group,  
461 however, often adopt the former youngs and contribute to their raising [9].

462 In Cantão none of the eleven resident pairs recorded during the study  
463 reproduced successfully, and none of the 12 transient pairs observed were accompanied  
464 by cubs. In contrast, groups of six or three giant otters were more successful in the  
465 number of cubs produced per group-year and in terms of the total number of cubs  
466 produced throughout the study. Groups of four and five individuals had a slightly lower  
467 reproductive rate than groups of three. This suggests that pairs of giant otters were  
468 generally unsuccessful in reproducing in this environment and that the formation of trios  
469 of giant otters is critical to the reproduction of the species in Cantão. All six trios whose  
470 formation was observed were formed through the recruitment of an adult individual by an  
471 existing pair.



472           The observed cub survival rate after one year (55%,  $n = 27$ ) is comparable to  
473 that reported in other studies [23]. Groenendijk et al. [18] found that 63% of cubs survived  
474 their first year in southeast Peru.

475

## 476 **Dispersal and Group Formation**

477           Observed group size in Cantão differs from that reported in other studies. In  
478 southeast Peru [18] reported groups of up to 13 individuals, with a mean group size of six  
479 otters. In the Xixuaú Preserve in Brazil, the mean group size was 4.5 individuals [3],  
480 whereas in the Pantanal mean group size was 4.8 [24]. The maximum group size reported  
481 has 15 individuals [25]. However, these studies did not report whether group size counts  
482 included cubs or only adults. Our group size counts excluded cubs, as the number of cubs  
483 accompanying a group is not stable, varying with new births and cub mortality. In Cantão  
484 the maximum group size observed was eight individuals, with a mean and median of four  
485 individuals per group. Only four groups with more than six members were recorded during  
486 the study and none of them reproduced. Three of these larger groups were reduced to  
487 six members in the following year, and one lasted for two years as a resident non-  
488 breeding group of eight members before being losing two members, after which the group  
489 had a litter. This preponderance of groups of three otters in Cantão further underscores  
490 the importance of trios in the ecology of giant otters in the region.

491           Dispersing giant otters are believed to go through a solitary transient phase  
492 during which they search for a mate and an empty patch of territory [2]. In Cantão we  
493 recorded 17 transient and 11 resident solitary individuals, with observed periods of  
494 residency varying from two months to over a year. Nine of these resident solitaries (82%)

495 eventually formed a pair or joined a resident group; only two transient solitaries (12%)  
496 were observed to do so during the same period. Seven out of eight solitaries males  
497 recorded were new to the study area, while all solitaries females (N = 4) originated from  
498 resident groups.

499 Pairs of giant otters recorded during the study tended to be transient and  
500 unstable and were unable to reproduce successfully. In 95% of recorded pairs with known  
501 history (N = 21) at least one member was a former resident of the study area. Ribas et al.  
502 [15] reported that newly formed pairs in the Pantanal also tended to be in the vicinity of  
503 the territory of at least one of the original groups. Only one of the eleven resident pairs  
504 observed in our study remained a pair for longer than one year. Pairs either became a  
505 trio through the recruitment of an outside individual, separated, or left the study area.  
506 Individual otters often went through two or more pair and/or trio formation attempts before  
507 settling into a stable group or disappearing.

508 In contrast to pairs, trios of giant otters tended to be stable, resident, and to  
509 reproduce successfully. Trios accounted for 35% of all resident groups recorded during  
510 the study and for 38% of all free-swimming cubs produced. Cub survival after one year  
511 for trios was 55% (N = 11), while for pairs it was 0% (N = 2) and for larger groups, it was  
512 64% (N = 14). Once a group became a trio it was able to grow larger by the addition of  
513 surviving cubs from previous years as well as immigrant individuals. However, as group  
514 size increased, the tendency for members to leave or disappear from the group also  
515 increased. Of 14 trios recorded that were seen again in the following year, three (21%)  
516 had been reduced to two members, seven (50%) remained as a trio, and four (29%) had  
517 increased in size. Of 17 groups of four or more members seen again in the following year,

518 nine (53%) decreased in size, six (35%) remained with the same number of members,  
519 and only two (12%) increased in size. By contrast, eight (36%) out of a total of 22 resident  
520 and transient pairs recorded became trios during the study. Additional transient pairs may  
521 have become trios and left the study area without being recorded as a trio. This suggests  
522 that the trio of adult-sized otters is a stable group configuration for giant otters in Cantão.  
523

## 524 **Home range shifting and overlap**

525 Home range overlap observed for resident giant otters in Cantão was very  
526 common. Most groups shared their home range with at least one other group, and larger  
527 lakes were often shared by four or five groups at different times. Groups rarely used the  
528 same lake for more than a few days, and when they left, they were often replaced by  
529 other groups. Some groups used certain lakes for alternating periods of one to several  
530 days over a month or more, often sleeping in the same dens and using the same latrines  
531 used previously by other groups. Groups with small cubs sometimes remained in the  
532 same lake for a month or more, but generally moved the cubs to a different lake at least  
533 once before they became free-swimming. This contrasts with findings by Staib [13] that  
534 indicate that giant otter ranges do not overlap at all in oxbow lake environments in  
535 southeast Peru. Evangelista and Rosas [26] observed partial range overlap in a tropical  
536 river habitat. Leuchtenberger et al. [25] also observed partial range overlap along linear  
537 river habitat in the Pantanal. The home range of some groups in the Pantanal overlapped  
538 partially with that of neighboring groups, but each group appeared to have a core territory  
539 that is actively defended. Although groups in the Pantanal tended to not use overlapped  
540 areas at the same time, 12 agonistic encounters between groups were observed over a

541 two-year study, including fights [27]. In Cantão only three agonistic encounters were  
542 recorded over ten years, both limited to territorial vocalizations between groups, but  
543 without fights.

544 Almost all observed groups shifted at least part of their home range from year  
545 to year, and many shifted to a completely different set of lakes between years. The high  
546 turnover rate of resident groups within the core study area is indicative of the frequency  
547 of large-scale shifting of home ranges. Sometimes group home ranges drifted slowly over  
548 the years until they left the study area, and other times a group would move to a  
549 completely new home range from one year to the next. Only seven of 23 (30%) resident  
550 groups remained in the study area for more than two years, and only five (21.7%)  
551 remained for more than three years. Regardless of how much they shifted their home  
552 ranges, groups were faced with a new set of neighbors each year, often sharing some of  
553 the same lakes. In oxbow lakes in southeast Peru, resident groups tend to remain within  
554 the same home range indefinitely [18, 28]. In the continuous river habitat of the Pantanal,  
555 Leuchtenberger et al. [27] observed shifting home ranges in a pattern similar to that  
556 observed in Cantão.

557

## 558 **Plasticity of Giant Otter Social and Territorial Behavior**

559 The observed differences in giant otter group dynamics and territorial behavior  
560 between Cantão and other sites can be explained by the spatial characteristics of the  
561 habitat. Previous long-term studies of the species were conducted in areas composed of  
562 patchy (isolated oxbow lakes) or linear (rivers) habitats. In the Cantão flooded forest  
563 ecosystem, as in some parts of the Brazilian Pantanal [17], optimal giant otter habitat is

564 continuous in all directions. In the dry season, most of Cantão lakes are connected within  
565 a few hundred meters of several other lakes. We also observed that giant otters use the  
566 flooded forests during the flood season. This affects both dispersal opportunities and cost-  
567 benefit tradeoffs for territorial defense.

568           Every resident giant otter group in our study had several other groups residing  
569 within a few hundred meters of its home range, and most of them shared part or all of  
570 their home range with up to six other groups. High-quality habitats can favor individual  
571 propensity to emigrate [29]. Dispersing giant otters in Cantão not only have a hospitable  
572 and predictable environment in all directions, which they may explore before emigrating,  
573 they are also familiar with potential partners in the surrounding area, some of which may  
574 be scent-marking at the same sites as the potential disperser's group. In the isolated  
575 oxbow lake environments studied elsewhere, potential dispersers may have to transit  
576 large patches of a suboptimal environment with which they are unfamiliar and depend on  
577 chance to meet potential partners. In linear river habitats, the potential disperser may find  
578 optimal habitat extending in one dimension, and maybe familiar with potential partners  
579 belonging to upstream and downstream neighboring groups. This habitat effect can  
580 explain the observed increase in average group size as individuals move from continuous  
581 and bidimensional habitats (flooded forest with high oxbow lake density) to linear but  
582 continuous habitats (rivers), to patchy discontinuous habitat (isolated lakes).

583           The fact that optimal habitat in Cantão is continuous but also fragmented into  
584 individual lakes may explain the tolerance for home range overlap displayed by resident  
585 giant otter groups. A “dear enemy” effect [30], where territorial animals direct less  
586 aggression toward established neighbors than toward strangers, maybe at play. Although

587 the dear enemy effect is more common when neighbors had well-established territories  
588 [31-33], the use of scent cues for individual and group recognition may act as a way to  
589 reduce aggressiveness in these fluctuating territories [34-36]. The resource availability in  
590 Cantão also renders the circumstantial benefits toward aggressive behaviors between  
591 groups to be minimal. Fish prey is abundant in hundreds of Cantão lakes, but foraging  
592 giant otters are constantly on the move, rarely stopping for more than a few minutes even  
593 at the most productive sites, probably reducing disturbance effects of fishing on fish  
594 wariness. Foraging giant otter groups create considerable disturbance through splashing,  
595 jumping, and turbulent swimming, and groups are soon forced to move to a different lake  
596 to continue foraging, even if the lake they just traversed still has plenty of fish. If a group  
597 arrives at a lake and finds that another group is already there, it may derive little  
598 immediate benefit from chasing the other group away because the lake has been  
599 disturbed, providing few foraging returns, being more profitable just to move on to another  
600 lake. A group wishing to avoid conflict can easily avoid encountering other groups by  
601 simply moving to one of many nearby lakes. Since lakes in Cantão are not large enough  
602 to be occupied continuously by a single group, a group cannot secure exclusive use of a  
603 lake no matter how much energy is expended in territorial defense. The optimal solution  
604 appears to be to tolerate other resident groups sharing the lakes within its home range  
605 as long as fish prey availability does not become a limiting factor.

606           The “dear enemy” effect is facilitated by the ability to recognize familiar  
607 neighbors [37], and giant otters are particularly well adapted for this due to their individual  
608 throat markings, scent cues, familiar sounds, and periscoping behavior. This may also

609 explain the tendency for the total number of adult otters in our research area to remain  
610 within a relatively narrow range even with a high annual turnover of resident groups.

611           The high annual variation in the number of cubs produced by giant otter groups  
612 in Cantão is also different from what was reported from other sites. This may also be  
613 explained by the specific territorial dynamics generated by the local landscape. We found  
614 a negative correlation between production of free-swimming cubs and the number of new  
615 adults moving into the area. A high proportion of newly arrived groups increases the  
616 likelihood of stressful encounters and/or costly avoidance behavior between groups. In  
617 captivity, stress caused by visitors can cause a giant otter mother to stop lactating [38].  
618 Londoño and Tigreros [39] reported that stress caused by noise or the presence of  
619 strangers caused giant otters to carry pups under 30 days old into the water, where in the  
620 wild they would be at risk of drowning or encountering predators. Schenk and Staib [40]  
621 observed that reproductive success was depressed for giant otters living in lakes heavily  
622 visited by tourists. Likely, increased stress caused by increased population density or the  
623 arrival of unfamiliar groups depresses the reproductive rate of giant otters in Cantão, and  
624 this may also contribute towards the maintenance of population density close to the  
625 environment's carrying capacity.

626

## 627 **Implications for Conservation**

628           The main bottleneck for successful colonization of new habitat by dispersing  
629 giant otters is whether a dispersing individual can meet a potential mate at the right time,  
630 in a suitable place [28]. If so, colonization of new areas may be more difficult in  
631 environments like Cantão, where it appears that the formation of a trio of giant otters is a

632 prerequisite for successful reproduction. This possibility should be taken into account in  
633 reintroduction projects for the species, which currently assume that the introduction of  
634 pairs of animals into the unoccupied habitat is sufficient to start a new population [41].  
635 Our findings also indicate that giant otters may change partners several times before  
636 settling into a stable group and successfully reproducing. This may be due to genetic or  
637 other incompatibilities that require trial and error to avoid. Isolated reintroduced groups  
638 may not be able to reproduce successfully even if they were captured and relocated as a  
639 group.

640           If the hypothesis of depressed reproductive success caused by stress  
641 provoked by encounters with strangers is correct, it could mean that frequent encounters  
642 with humans may also reduce the rate of reproduction of giant otters. Even when intruding  
643 humans don't directly encounter giant otter groups, the disturbance of prey by fishing or  
644 other activity may have an effect analogous to an additional giant otter group foraging  
645 through the habitat, and if it occurs repeatedly, it may reduce reproductive success and  
646 decrease the area's carrying capacity. We documented three episodes of giant otters  
647 relocating very young pups after brief encounters with intruders in Cantão. Two of these  
648 episodes were merely a motorboat passing by the breeding den. The same groups were  
649 largely indifferent to approaches by researchers with whom they were familiar, to the  
650 extent of bringing out the cubs for swimming lessons in the presence of five researchers  
651 observing without cover from less than 100 meters away. Breeding refuges where  
652 humans are excluded, or allowed only under strict regulation and monitoring, may be  
653 essential to the reproduction of giant otters. This reinforces the importance of the strict



654 protected areas (IUCN Category 2 or higher) with zones where no visitation is allowed for  
655 the conservation of the species.

656           The Cantão ecosystem appears to sustain a high density of giant otters  
657 compared to other sites, mainly due to its abundance of fish prey and suitable habitat.  
658 Overall giant otter densities at other protected areas tend to be relatively low because  
659 these areas consist largely of unsuitable habitat, while all of Cantão State Park consists  
660 of habitat similar to that of the study area. If the density of resident groups in the 16 lakes  
661 of our study area is indicative of the density of the species throughout the park's 850  
662 oxbow lakes, this may be one of the most important protected areas for the species today.  
663 Habitat similar to Cantão's, with large numbers of oxbow lakes within an igapó flooded  
664 forest matrix, also occurs at other sites in the Amazon basin, such as along the lower  
665 reaches of the Juruá, Purus, Tefé, and Jaú rivers. Identifying and surveying these sites,  
666 even if giant otters are currently rare or absent in some of them, may help to identify  
667 critical areas for the recovery and protection of the species.

668

## 669 **Acknowledgments**

670 The authors would like to thank Dr Nicole Duplaix and Dr Christof Schenk for their support  
671 and technical advice throughout the years. Special thanks to Dr Robin Williams and Ms.  
672 Daniella Woodall for providing technical assistance in the field, and to Ms. Cheryl Williams  
673 for her support. We also extend our gratitude to our volunteers Adriana Luz, Melissa  
674 Savage, Jean-Paul Magnan, Elena Weindel, Sarah Griswold, Iris Berger and Gabriel  
675 Mihahira for their contribution to this research. We are in debt to all the staff and rangers  
676 of Instituto Araguaia over the years, in particular to our deceased ranger Mr. Manoel Dias

677 da Silva, native of Cantão and dedicated conservationist, for his intrinsic knowledge and  
678 precise insights on giant otters and their habitat.

679

680

## 681 **References**

- 682 1. Carter SK, Rosas FCW. Biology and Conservation of the Giant Otter - *Pteronura*  
683 *brasiliensis*. *Mamm Rev.* 1997; 27:1-26.
- 684 2. Duplaix N, Evangelista ER, Rosas FCW. Advances in the study of giant otter  
685 (*Pteronura brasiliensis*) ecology, behavior, and conservation: a review. *Lat Am J*  
686 *Aquat Mamm.* 2015; 10(2): 75-98.
- 687 3. Evangelista ER, Rosas FCW. The home range and movements of giant otters  
688 (*Pteronura brasiliensis*) in the Xixuaú Reserve, Roraima, Brazil. *IUCN Otter*  
689 *Specialist Group Bulletin.* 2011; 28A: 31-37.
- 690 4. Groenendijk J, Marmontel M, Van Damme P, Schenck C, Schenck, C. & Wallace,  
691 R. 2021. *Pteronura brasiliensis*. The IUCN Red List of Threatened  
692 Species 2021:e.T18711A164580466. [https://dx.doi.org/10.2305/IUCN.UK.2021-](https://dx.doi.org/10.2305/IUCN.UK.2021-3.RLTS.T18711A164580466.en)  
693 [3.RLTS.T18711A164580466.en](https://dx.doi.org/10.2305/IUCN.UK.2021-3.RLTS.T18711A164580466.en). [cited 2022 Jan 07].
- 694 5. Rodrigues, L. D. A., Leuchtenberger, C., & da Silva, V. C. F. (2013). Avaliação do  
695 risco de extinção da ariranha *Pteronura brasiliensis* (Zimmermann, 1780) no  
696 Brasil. *Biodiversidade Brasileira*, 3(1), 228-239. Portuguese.
- 697 6. Tocantins. Plano de Manejo do Parque Estadual do Cantão. Secretaria do  
698 Planejamento e Meio Ambiente do Estado do Tocantins, Palmas. 2016.  
699 Portuguese.
- 700 7. Georgiadis G, Campello S, Leles BN. Protection and monitoring of the giant otter  
701 (*Pteronura brasiliensis*) in Cantão State Park, Tocantins, Brazil. *Lat Am J Aquat*  
702 *Mamm.* 2015; 10(2): 152-155.

- 703 8. Tocantins. Secretaria de Planejamento e Meio Ambiente. Atlas do Tocantins:  
704 subsídios ao planejamento da gestão territorial. Diretoria de Zoneamento  
705 Ecológico – Econômico. Palmas. 2012. Portuguese.
- 706 9. Ferreira E, Zuanon J, Santos G, Amadio S. The fish fauna of the Parque Estadual  
707 do Cantão, Araguaia River, State of Tocantins, Brazil. *Biota Neotrop.* 2011; 11(2).
- 708 10. Rosas-Ribeiro, P. F., Rosas, F. C., & Zuanon, J. Conflict between fishermen and  
709 giant otters *Pteronura brasiliensis* in Western Brazilian Amazon. *Biotropica*,  
710 2012;44(3), 437-444.
- 711 11. Brasil - Ministério do Meio Ambiente. Parque do Cantão é referência em gestão.  
712 c2017 [cited 2021 Sep 21]. Available from: [https://www.gov.br/mma/pt-](https://www.gov.br/mma/pt-br/noticias/noticia-acom-2017-07-2462)  
713 [br/noticias/noticia-acom-2017-07-2462](https://www.gov.br/mma/pt-br/noticias/noticia-acom-2017-07-2462). Portuguese.
- 714 12. Groenendijk J, Hajek F, Duplaix, N, Reuther C, Van Damme P, et al. Surveying  
715 and Monitoring Distribution and Population trends of the Giant Otter (*Pteronura*  
716 *brasiliensis*) – Guidelines for a Standardisation of Survey Methods as  
717 Recommended by the Giant Otter Section of the IUCN/SSC Otter Specialist  
718 Group. Habitat 16 2005. *Arbeitsberichte der Aktion Fischotterschutz e.V.*, ISBN 3-  
719 927650-26-9, 100pp.
- 720 13. Staib E. Eco-Etología del Lobo de Río (*Pteronura brasiliensis*) en el Sureste del  
721 Perú. Spanish translation of German, *Ayuda para Vida Silvestre Amenazada –*  
722 *Sociedad Zoológica de Francfort Perú*; 2005 ISBN 9972-2585-0-5; 195 pp.  
723 Spanish.
- 724 14. Duplaix N. Observations on the ecology and behaviour of the Giant Otter *Pteronura*  
725 *brasiliensis* in Suriname. *Rev Ecol. Terre Vie* 1980; 34: 495–620.

- 726 15. Ribas C, Cunha HA, Damasceno G, Magnusson W, Sole-Cava, AM, Mourão G.  
727 More than meets the eye: kinship and social organization in giant otters (*Pteronura*  
728 *brasiliensis*). *Behav Ecol Sociobiol.* 2016; 70: 61-72.
- 729 16. Evangelista ER. Change of partners in a giant otter alpha couple. *IUCN Otter*  
730 *Specialist Group Bulletin.* 2004; 21: 47–51.
- 731 17. Leuchtenberger C, Mourão G. Social organization and territoriality of giant otters  
732 (*Carnivora: Mustelidae*) in a seasonally flooded savanna in Brazil. *Sociobiology.*  
733 2008; 52:257-270.
- 734 18. Groenendijk J, Hajek F, Johnson PJ, Macdonald DW, Calvimontes J, et al.  
735 Demography of the Giant Otter (*Pteronura brasiliensis*) in Manu National Park,  
736 South-Eastern Peru: Implications for Conservation. *PLoS One.* 2014; 9(8):  
737 e106202. doi:10.1371/journal.pone.0106202
- 738 19. Mourão G, Carvalho L. Cannibalism among giant otters (*Pteronura brasiliensis*).  
739 *Mammalia.* 2001; 65:225-227.
- 740 20. Ribas C, Damasceno G, Magnusson W, Leuchtenberger C, Mourão G. Giant otters  
741 feeding on caiman: evidence for an expanded trophic niche of recovering  
742 populations. *Stud Neotrop Fauna.* 2012;E 47:19–23
- 743 21. Ribas C, Mourão G. Intraspecific agonism between giant otter groups. *IUCN Otter*  
744 *Specialist Group Bulletin.* 2004;21:89-93.
- 745 22. Rosas FCW, Mattos GE. Notes on giant otter (*Pteronura brasiliensis*) behavior in  
746 the lake of the Balbina Hydroelectric Power Station, Amazonas, Brazil. *Lat Am J*  
747 *Aquat Mamm.* 2003;2(2): 127-129.

- 748 23. Davenport LC. Aid to a Declining Matriarch in the Giant Otter (*Pteronura*  
749 *brasiliensis*). PLoS One. 2010; 5(6): e11385. doi:10.1371/journal.pone.0011385
- 750 24. Tomas WM, Camilo AR, Ribas C, Leuchtenberger C, Borges PAL, et al.  
751 Distribution and status of giant otter (*Pteronura brasiliensis*) in the Pantanal  
752 wetland, Brazil. Lat Am J Aquat Mamm. 2015;10: 107-114.
- 753 25. Leuchtenberger C, Oliveira-Santos GR, Magnusson W, Mourão G. Space use by  
754 giant otter groups in the Brazilian Pantanal. J Mammal. 2013;94:320-330.
- 755 26. Evangelista ER & Rosas FCW, 2011. Breeding behavior of giant otters (*Pteronura*  
756 *brasiliensis*) in the Xixuaú Reserve, Roraima, Brazil. IUCN Otter Specialist Group  
757 Bulletin 2011; 28A: 5-10.
- 758 27. Leuchtenberger C, Magnusson WE, Mourão G. Territoriality of Giant Otter Groups  
759 in an Area with Seasonal Flooding. PLoS One. 2015;10(5):e0126073.  
760 doi:10.1371/journal.pone.0126073
- 761 28. Schenck C, Groenendijk J, Hajek F, Staib E, Frank K. Giant otters in the Peruvian  
762 rainforest: linking protected area conditions to species needs. In: Landscape  
763 ecology and resource management: linking theory with practice; 2003. p 341-358.
- 764 29. Stamps JA. The effect of familiarity with a neighborhood on territory acquisition.  
765 Behav Ecol. Sociobiol. 1987: 21, 273-277. <https://doi.org/10.1007/BF00299964>
- 766 30. Fisher J. Evolution and bird sociality. In J. Huxley, A. C. Hardy, & E. B. Ford (Eds.),  
767 Evolution as a process. 1954; pp. 71–83. London: Allen & Unwin.
- 768 31. Erlinge S. Territoriality of the otter, *Lutra lutra* L., in Southern Sweden. Oikos.  
769 1968;19, 81-98.

- 770 32. Hutchings MR, White PCL. Mustelid scent-marking in managed ecosystems:  
771 implications for population management. *Mammal Rev.* 2000; 30, 157-169.
- 772 33. Rostain RR, Ben-David M, Groves P, Randall JA. Why do river otters scent-  
773 mark? An experimental test of several hypotheses *Anim. Behav.* 2004; 68, 703-  
774 711.
- 775 34. Heinze J, Foitzik S, Hippert A, Hölldobler B. Apparent dear-enemy phenomenon  
776 and environment-based recognition cues in the ant *Leptothorax nylanderi*.  
777 *Ethology.* 1996; 102(3), 510-522.
- 778 35. Leuchtenberger C, Mourão G. Scent-marking of giant otter in the southern  
779 Pantanal, Brazil. *Ethology.* 2009. 115:210-216.
- 780 36. Zenuto RR. Dear enemy relationships in the subterranean rodent *Ctenomys*  
781 *talarum*: the role of memory of familiar odours. *Animal Behaviour.*  
782 2010;79(6):1247-1255.
- 783 37. Tumulty JP. Dear Enemy Effect. In: Vonk J, Shackelford T, editors. *Encyclopedia*  
784 *of Animal Cognition and Behavior.* Springer Cham. 2018.  
785 [https://doi.org/10.1007/978-3-319-47829-6\\_693-1](https://doi.org/10.1007/978-3-319-47829-6_693-1)
- 786 38. Sykes-Gatz S. Husbandry and management of the giant otter (*Pteronura*  
787 *brasiliensis*). 2.ed. Zoo Dortmund, Dortmund, Germany 2005: 270 p.
- 788 39. Londoño, Tigreros. Reproduction, behaviour and biology of the giant river otter  
789 *Pteronura brasiliensis* at Cali Zoo - *International Zoo Yearbook.* 2006
- 790 40. Schenck C, Staib E. Giant otter: a giant under even bigger pressure. Esta-Druck,  
791 S.Tafertshorfer Polling for the Frankfurt Zoological Society, Frankfurt, Germany;  
792 1994. 203 pp.

793 41. Zamboni T, Peña J, Di Martino S, Leuchtenberger C. Experimental Reintroduction  
794 of the giant otter (*Pteronura brasiliensis*) in the Iberá Park (Corrientes, Argentina).  
795 CLT The Conservation Land Trust. 2018. Available from:  
796 <https://rewildingargentina.org/proyecto-ibera/#nutria-gigante>



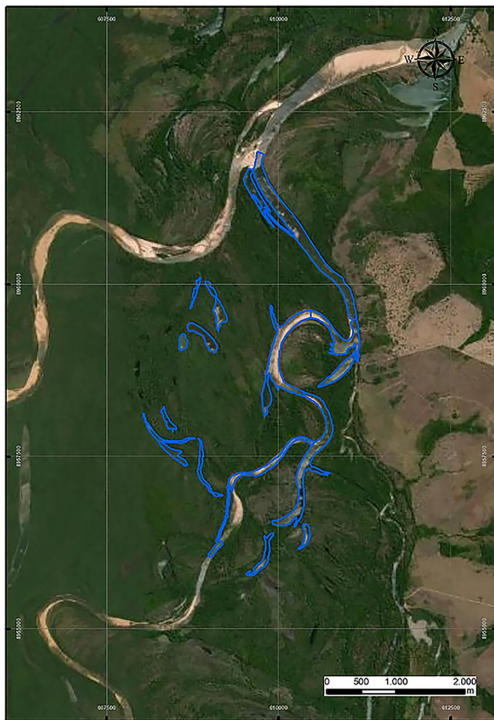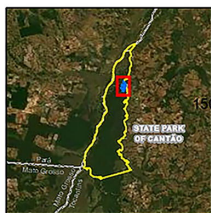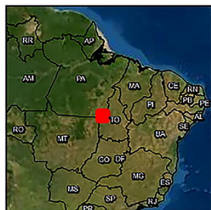

## Legend

-  Study Area
-  State Park of Cantão
-  State Limit

References:  
State Limit, IBGE;  
State Park, MMA;

1:75,000  
SIRGAS 2000 UTM Zone 22S  
Projection: Transverse\_Mercator

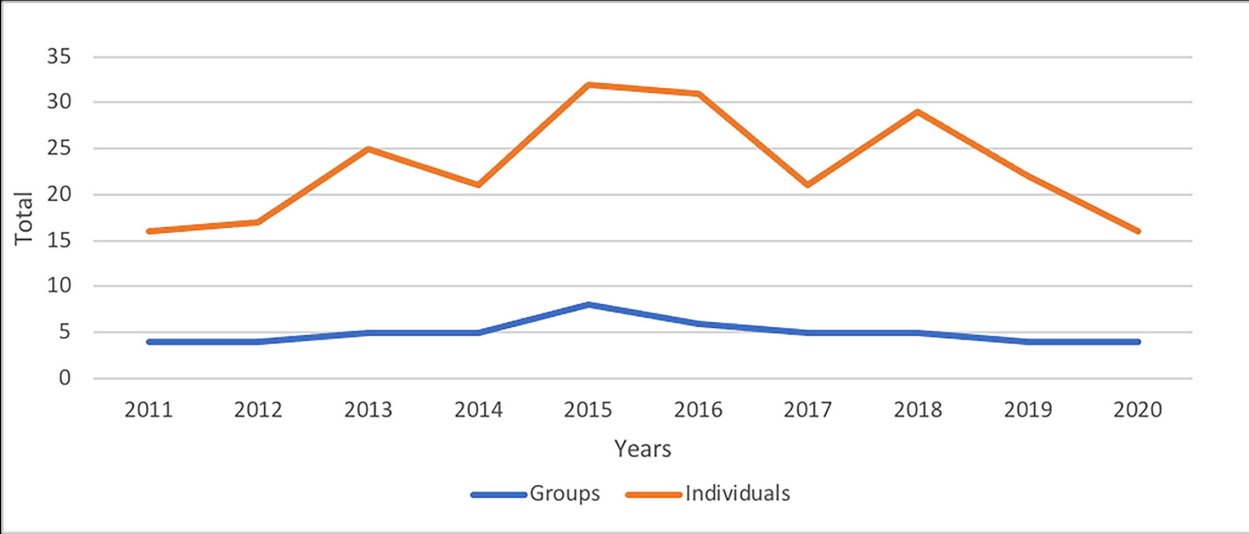

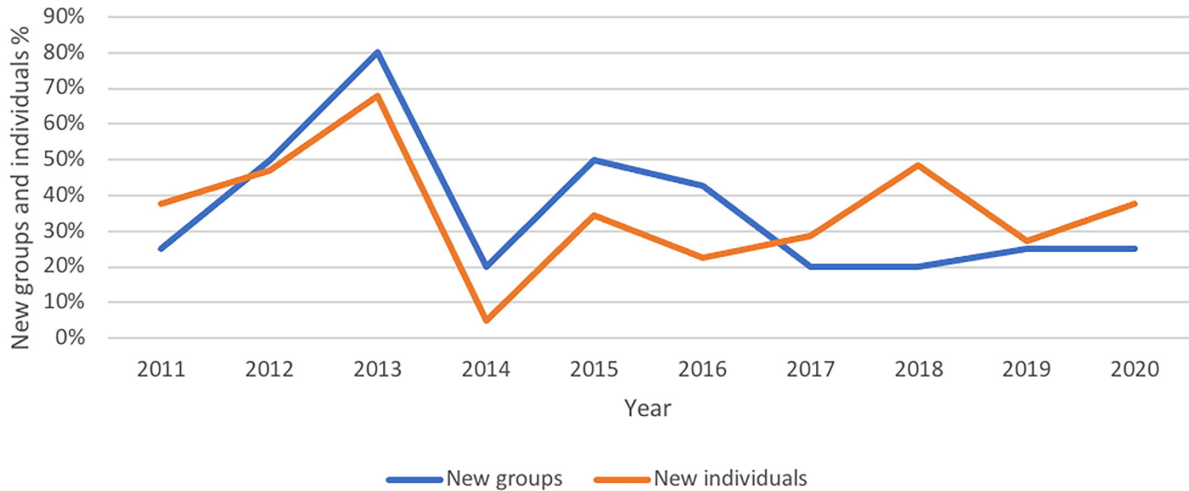

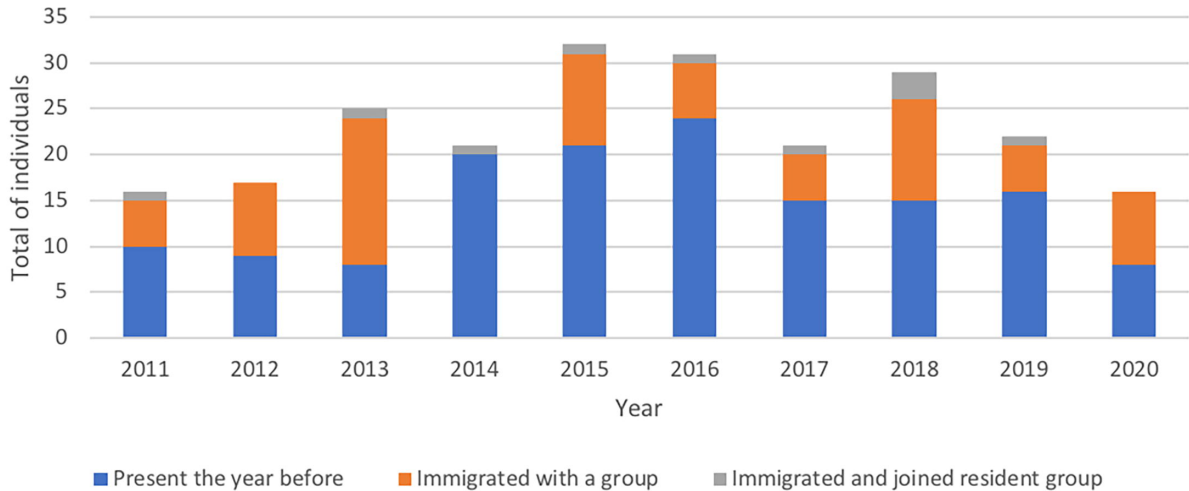

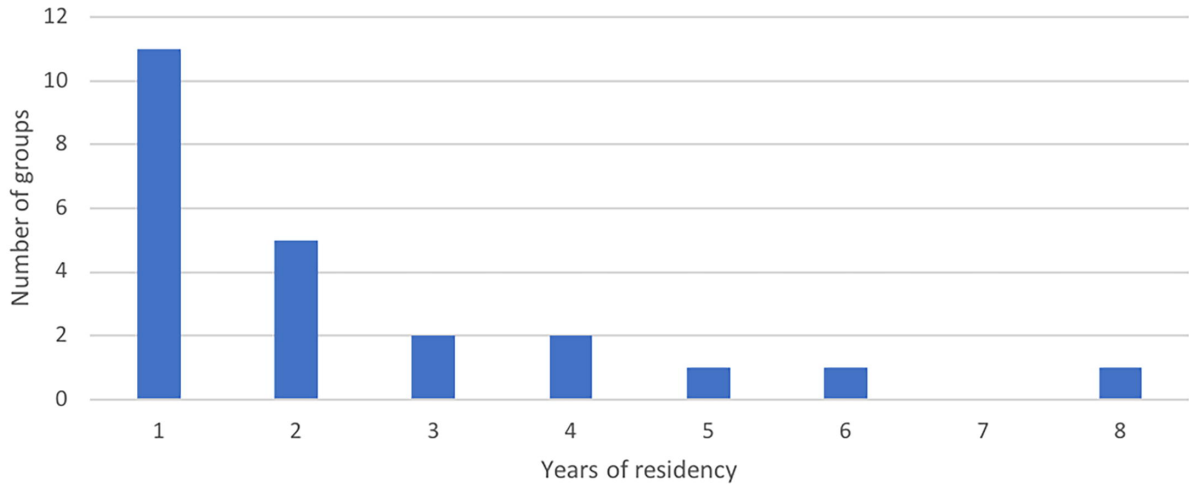

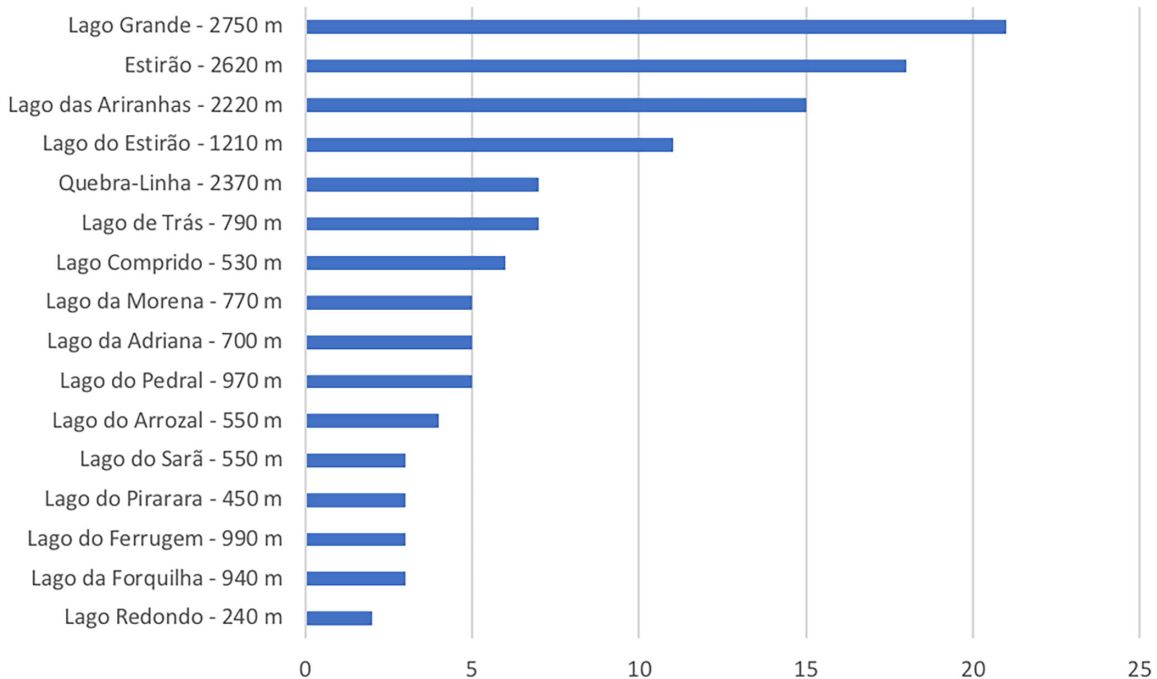

2011

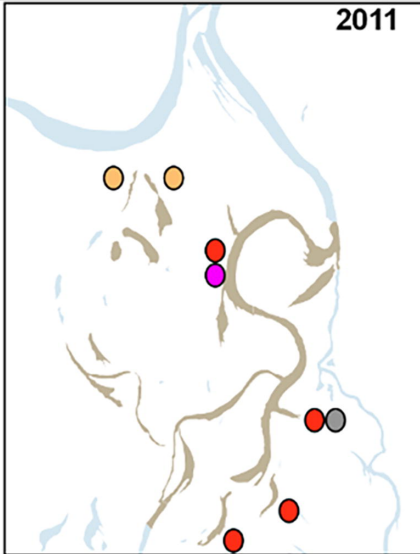

2012

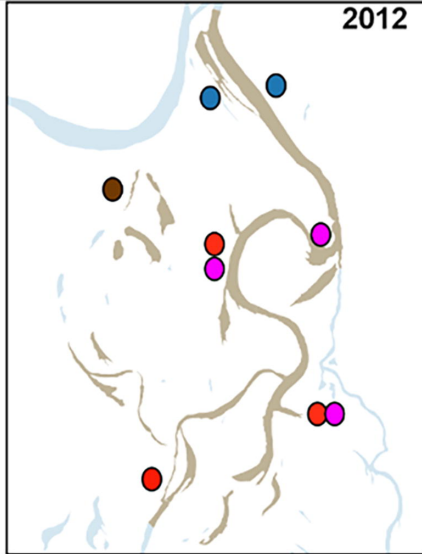

2013

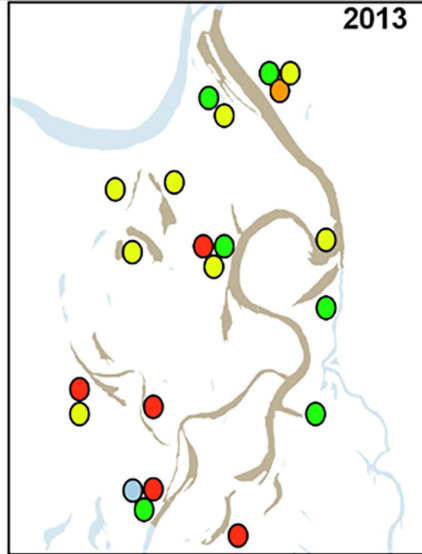

2014

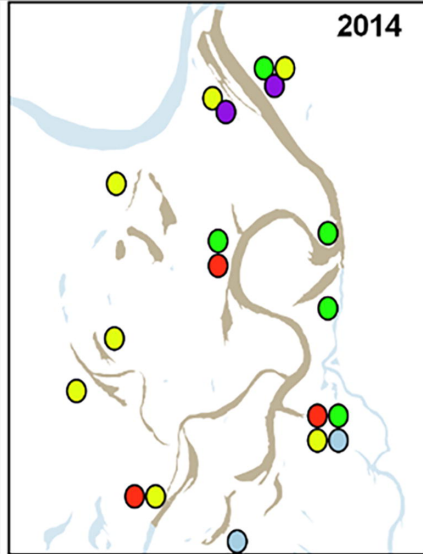

2015

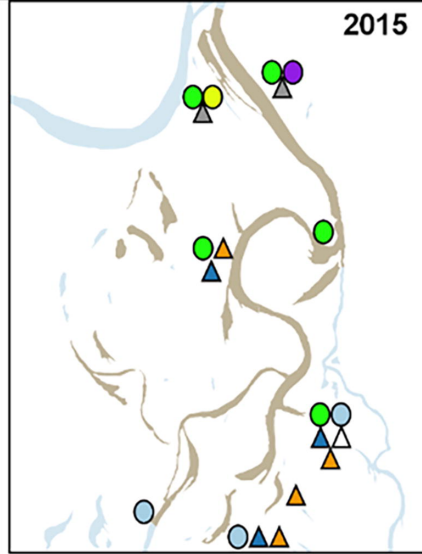

2016

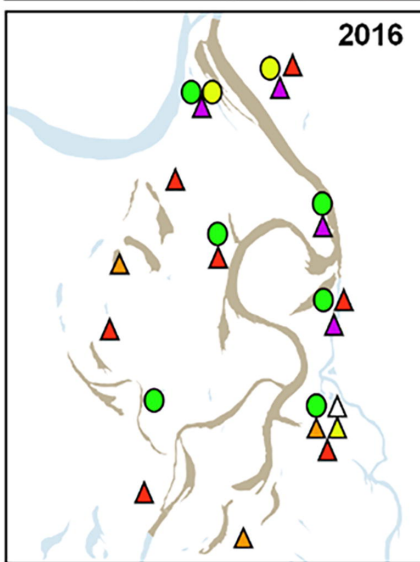

2017

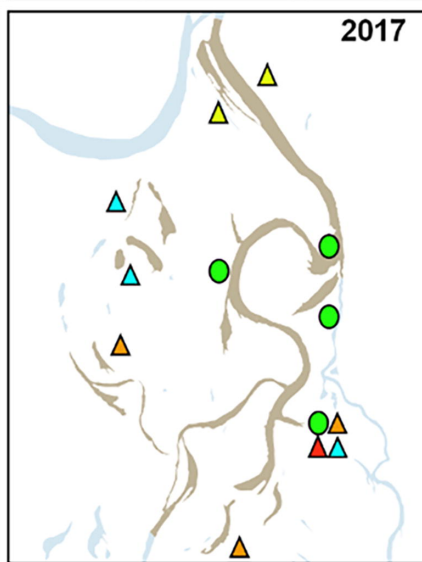

2018

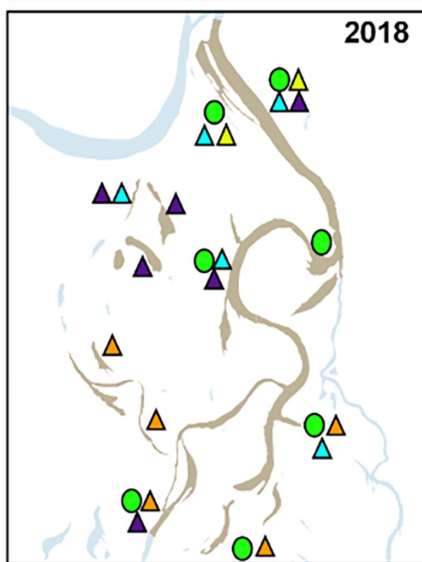

2019

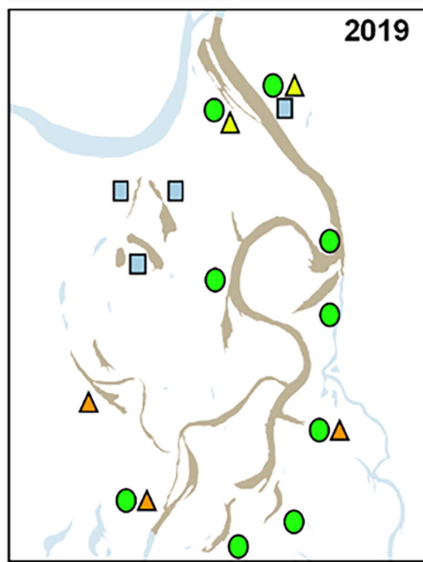

2020

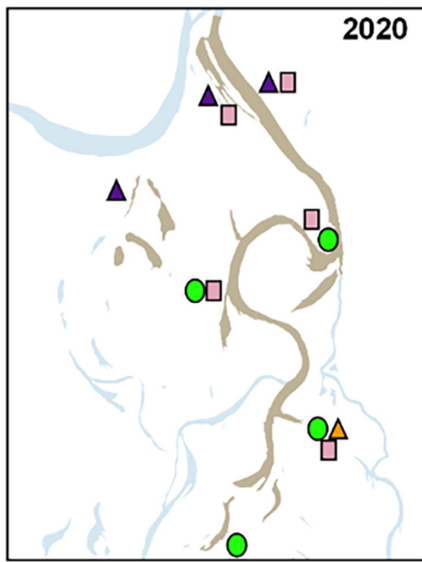

### Elements of the map

Core Study Area Hydrography

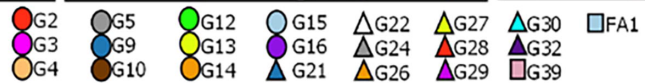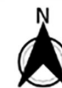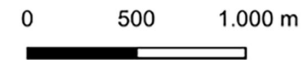

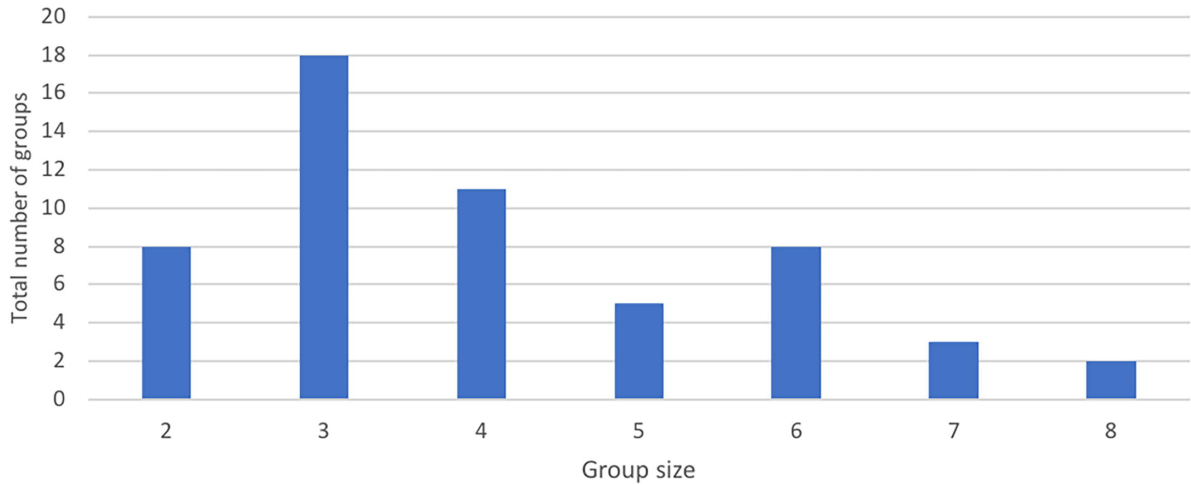



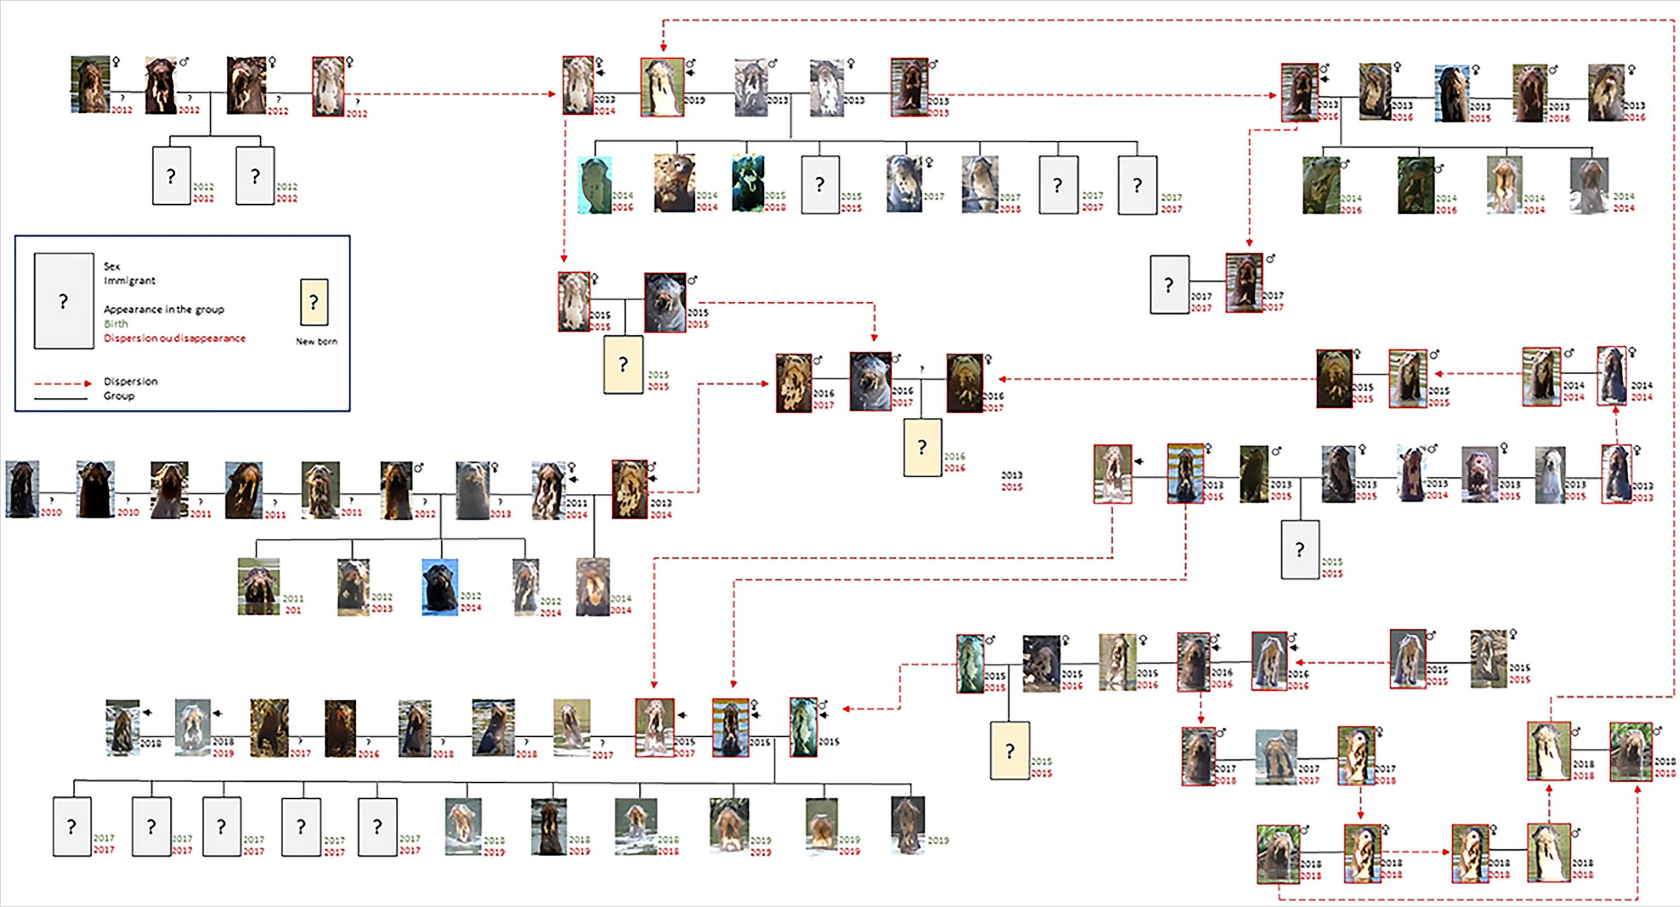

Number of litters

8  
7  
6  
5  
4  
3  
2  
1  
0

1

2

3

4

5

Litter size

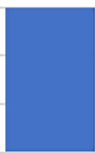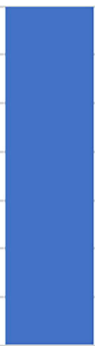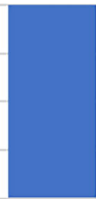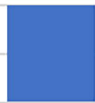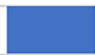

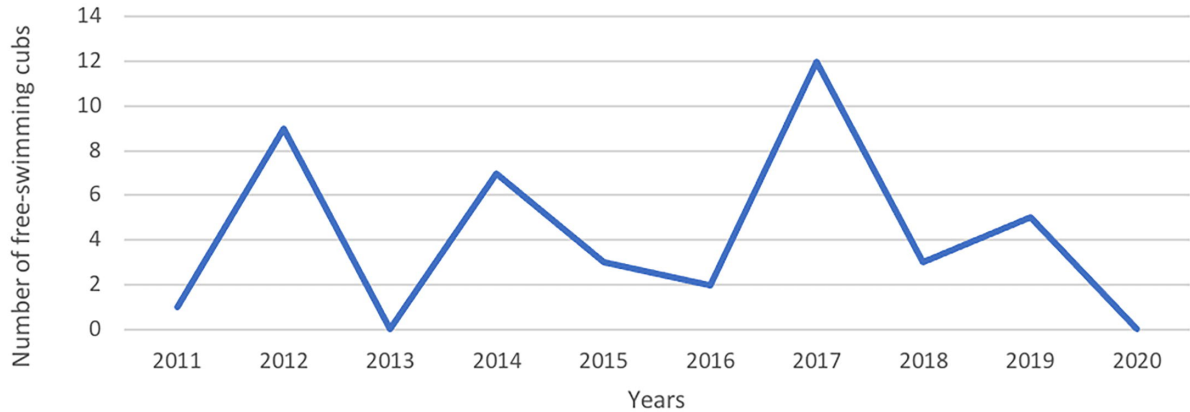

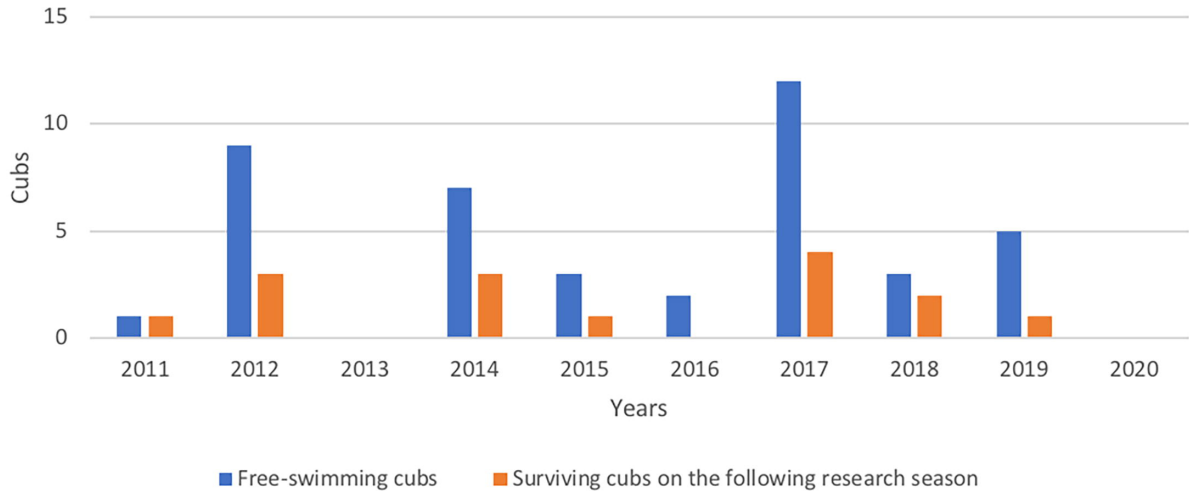

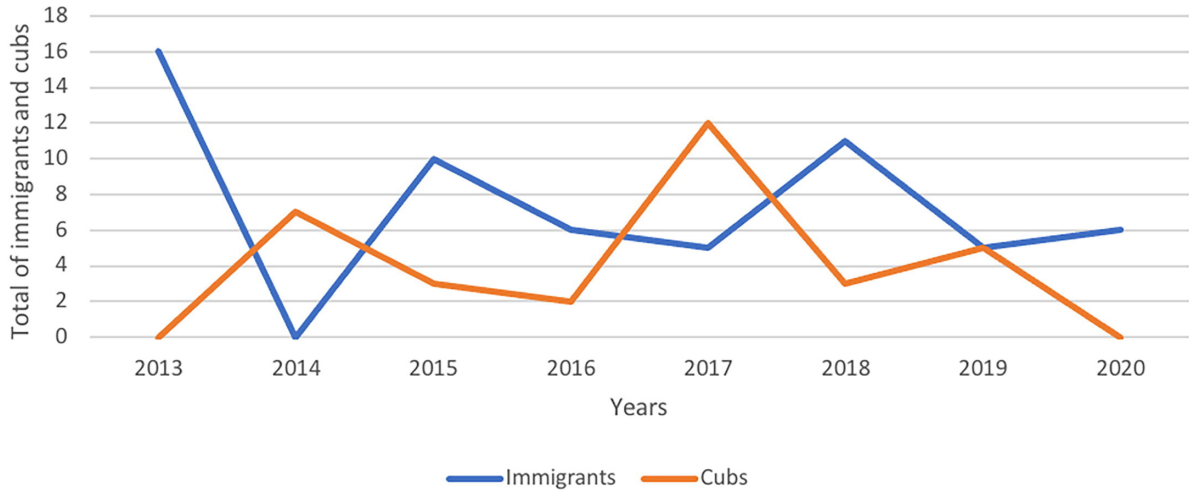

Source: https://www.biorxiv.org/content/10.1101/2022.01.30.478386v1.full.pdf
